# Supplementary material for: Synthesis and properties of an Au6 cluster supported by a mixed N-heterocyclic carbene–thiolate ligand
Source: Royal Society of Chemistry journal article supplement (doi:10.1039/d0cc01482f), 2020-01-01
Supplement: d0cc01482f1.pdf [file d0cc01482f1.pdf]

## Electronic Supplementary Information

### Synthesis and Properties of an Au<sub>6</sub> Cluster Supported by a Mixed *N*-Heterocyclic Carbene-Thiolate ligand

Kirsi Salorinne,<sup>a</sup> Renee W. Y. Man,<sup>a</sup> Paul A. Lummis,<sup>b</sup> Maryam Sabooni Asre Hazer,<sup>c</sup> Sami Malola,<sup>c</sup> Jacky C.-H. Yim,<sup>a</sup> Alex J. Veinot,<sup>b</sup> Wenxia Zhou,<sup>b</sup> Hannu Häkkinen,<sup>c\*</sup> Masakazu Nambo,<sup>a\*</sup> and Cathleen M. Crudden<sup>a,b\*</sup>

<sup>a</sup> Institute of Transformative Bio-Molecules (WPI-ITbM), Nagoya University, Chikusa, Nagoya, Aichi 464-8602, Japan.

<sup>b</sup> Department of Chemistry, Queen's University, Chernoff Hall, Kingston, Ontario, K7L 3N6, Canada.

<sup>c</sup> Departments of Chemistry and Physics, Nanoscience Centre, University of Jyväskylä, 40014 Jyväskylä, Finland

#### Table of Contents

|                                                                                                            |    |
|------------------------------------------------------------------------------------------------------------|----|
| 1. General Experimental Considerations .....                                                               | 4  |
| 1.1 Materials .....                                                                                        | 4  |
| 1.2 Instrumentation and Sample Preparation .....                                                           | 4  |
| 1.2 Computational Methods.....                                                                             | 4  |
| 2. Synthetic Procedures.....                                                                               | 5  |
| 3-(2-bromoethyl)-1-isopropylbenzimidazolium bromide (2a). .....                                            | 5  |
| 3-(3-bromopropyl)-1-isopropyl-benzimidazolium bromide (2b). .....                                          | 5  |
| 3-(2-(acetylthio)ethyl)-1-isopropylbenzimidazolium bromide (3a). .....                                     | 5  |
| 3-(3-(acetylthio)propyl)-1-isopropyl-benzimidazolium bromide (3b). .....                                   | 5  |
| (3-(2-(acetylthio)ethyl)-1-isopropylbenzimidazole)gold bromide (4a). .....                                 | 6  |
| 3-(2-(acetylthio)propyl)-1-isopropylbenzimidazole)gold bromide (4b). .....                                 | 6  |
| [(NHC-S) <sub>4</sub> Au <sub>6</sub> ]Br <sub>2</sub> (5a). .....                                         | 7  |
| Reaction of compound 4b with HBr.....                                                                      | 7  |
| 3. Experimental data .....                                                                                 | 8  |
| 3.1 NMR Spectroscopy .....                                                                                 | 8  |
| 3.1.1 Figure S1: <sup>1</sup> H NMR spectrum (400 MHz, CDCl <sub>3</sub> ) of 2a. ....                     | 8  |
| 3.1.2 Figure S2: <sup>13</sup> C{ <sup>1</sup> H} NMR spectrum (101 MHz, CDCl <sub>3</sub> ) of 2a. ....   | 9  |
| 3.1.3 Figure S3: <sup>1</sup> H NMR spectrum (600 MHz, CDCl <sub>3</sub> ) of 2b. ....                     | 10 |
| 3.1.4 Figure S4: <sup>13</sup> C{ <sup>1</sup> H} NMR spectrum (151 MHz, CDCl <sub>3</sub> ) of 2b. ....   | 11 |
| 3.1.5 Figure S5: <sup>1</sup> H NMR spectrum (400 MHz, CDCl <sub>3</sub> ) of 3a. ....                     | 12 |
| 3.1.6 Figure S6: <sup>13</sup> C{ <sup>1</sup> H} NMR spectrum (101 MHz, CDCl <sub>3</sub> ) of 3a. ....   | 13 |
| 3.1.7 Figure S7: <sup>1</sup> H NMR spectrum (600 MHz, CDCl <sub>3</sub> ) of 3b. ....                     | 14 |
| 3.1.8 Figure S8: <sup>13</sup> C{ <sup>1</sup> H} NMR spectrum (151 MHz, CDCl <sub>3</sub> ) of 3b. ....   | 15 |
| 3.1.9 Figure S9: <sup>1</sup> H NMR spectrum (400 MHz, CDCl <sub>3</sub> ) of 4a. ....                     | 16 |
| 3.1.10 Figure S10: <sup>13</sup> C{ <sup>1</sup> H} NMR spectrum (101 MHz, CDCl <sub>3</sub> ) of 4a. .... | 17 |

|        |                                                                                                                                           |    |
|--------|-------------------------------------------------------------------------------------------------------------------------------------------|----|
| 3.1.11 | Figure S11: $^1\text{H}$ NMR spectrum (600 MHz, $\text{CDCl}_3$ ) of 4b.                                                                  | 18 |
| 3.1.12 | Figure S12: $^{13}\text{C}\{^1\text{H}\}$ NMR spectrum (151 MHz, $\text{CDCl}_3$ ) of 4b.                                                 | 19 |
| 3.1.13 | Figure S13: $^1\text{H}$ NMR spectrum (400 MHz, $\text{CD}_3\text{OD}$ ) of 5a.                                                           | 20 |
| 3.1.14 | Figure S14: $^{13}\text{C}\{^1\text{H}\}$ NMR spectrum (101 MHz, $\text{CDCl}_3$ ) of 5a.                                                 | 21 |
| 3.2    | UV-visible Spectroscopy                                                                                                                   | 22 |
| 3.2.1  | Figure S15: UV-Vis Spectrum of 5a in MeOH.                                                                                                | 22 |
| 3.3    | Mass Spectroscopy                                                                                                                         | 23 |
| 3.3.1  | Figure S16: ESI-MS of 2a                                                                                                                  | 23 |
| 3.3.2  | Figure S17: ESI-MS of 2b                                                                                                                  | 23 |
| 3.3.3  | Figure S18: ESI-MS of 3a                                                                                                                  | 24 |
| 3.3.4  | Figure S19: ESI-MS of 3b                                                                                                                  | 24 |
| 3.3.5  | Figure S20: ESI-MS of 4a                                                                                                                  | 25 |
| 3.3.6  | Figure S21: ESI-MS of 4b                                                                                                                  | 25 |
| 3.3.7  | Figure S22: ESI-MS of 5a                                                                                                                  | 26 |
| 3.4    | X-ray Crystallography                                                                                                                     | 27 |
| 3.4.1  | Table S1: X-ray data for 4a.                                                                                                              | 27 |
| 3.4.2  | Table S2: Atomic coordinates ( $\times 10^4$ ) and equivalent isotropic displacement parameters ( $\text{\AA}^2 \times 10^3$ ) for 4a.    | 28 |
| 3.4.3  | Table S3: Bond lengths [ $\text{\AA}$ ] and angles [ $^\circ$ ] for 4a.                                                                   | 29 |
| 3.4.4  | Table S4: Anisotropic displacement parameters ( $\text{\AA}^2 \times 10^3$ ) for 4a.                                                      | 32 |
| 3.4.5  | Table S5: Anisotropic Hydrogen coordinates ( $\times 10^4$ ) and isotropic displacement parameters ( $\text{\AA}^2 \times 10^3$ ) for 4a. | 33 |
| 3.4.6  | Table S6: X-ray data for 5a.                                                                                                              | 34 |
| 3.4.7  | Table S7: Atomic coordinates ( $\times 10^4$ ) and equivalent isotropic displacement parameters                                           | 35 |
| 3.4.8  | Table S8: Bond lengths [ $\text{\AA}$ ] and angles [ $^\circ$ ] for 5a.                                                                   | 36 |
| 3.4.9  | Table S9: Anisotropic displacement parameters                                                                                             | 38 |
| 3.4.10 | Table S10: Hydrogen coordinates.                                                                                                          | 39 |
| 3.4.11 | Table S11: Torsion angles [ $^\circ$ ] for 5a.                                                                                            | 40 |
| 3.4.12 | Table S12: Hydrogen bonds for 5a [ $\text{\AA}$ and $^\circ$ ].                                                                           | 41 |
| 3.5    | Cyclic voltammetry                                                                                                                        | 42 |
| 3.5.1  | Figure S23: Cyclic voltammogram of 5a.                                                                                                    | 42 |
| 4.     | Computational data                                                                                                                        | 43 |
| 4.1    | Computational analysis of cluster 5a.                                                                                                     | 43 |
| 4.1.1  | Figure S24: Relaxed structure of 5a calculated using PBE functional.                                                                      | 43 |
| 4.1.2  | Figure S25: Gold-projected density of states for 5a.                                                                                      | 43 |
| 4.1.3  | Figure S26: A few frontier orbitals for 5a.                                                                                               | 44 |
|        |                                                                                                                                           | 44 |
|        |                                                                                                                                           | 44 |
| 4.1.4  | Table S13: Shortest Au-Au distances in 5a.                                                                                                | 45 |

|       |                                                                                                                    |    |
|-------|--------------------------------------------------------------------------------------------------------------------|----|
| 4.1.5 | Figure S27: Dipole transition contribution maps (DTCM) analysis for 5a – Principal axes of moments of inertia..... | 45 |
| 4.1.6 | Figure S28: DTCM for peak at E = 3.779 eV.....                                                                     | 46 |
| 4.1.7 | Figure S29: DTCM for peak at E = 4.413 eV.....                                                                     | 46 |
| 4.1.8 | Figure S30: DTCM for peak at E = 4.570 eV.....                                                                     | 47 |
| 5.    | References.....                                                                                                    | 47 |

## 1. General Experimental Considerations

### 1.1 Materials

Unless otherwise noted, all materials including dry solvents were obtained from commercial suppliers and used without further purification. 1-Isopropylimidazole and chloro(dimethylsulfide)gold(I) were prepared according to a literature procedure.<sup>1</sup>

### 1.2 Instrumentation and Sample Preparation

**<sup>1</sup>H and <sup>13</sup>C NMR** spectra were measured with JEOL ECS 400 MHz, JEOL JNM-ECA600II (600 MHz), or Bruker Avance-300 spectrometers and chemical shifts were calibrated to the residual proton or <sup>13</sup>C carbon resonance of the deuterated solvent, which was referenced to tetramethylsilane. All NMR data processing was carried out using either Topspin v.4 or Mestrenova v.12. **HRMS-ESI** spectra were measured using a Thermo Scientific Exactive mass spectrometer. **UV-Vis** spectra were recorded with Agilent Cary 60 UV-vis spectrometer using 1 cm quartz cuvettes. **Single crystal X-ray diffraction** crystals of appropriate quality for X-ray diffraction studies covered with a thin layer of hydrocarbon oil (Paratone-N). A suitable crystal was then selected, attached to a glass fibre or a microsampler, and quickly placed in a low-temperature stream of nitrogen.<sup>2</sup> Data for **4a** were collected at Queen's University using a Bruker AXS D8 Venture Duo diffractometer using Mo K<sub>α</sub> radiation ( $\lambda = 0.71073$  Å), with the crystal cooled to -100 °C. Data for **4a** were solved using intrinsic phasing (SHELXT)<sup>3</sup> and refined using SHELXL-2014.<sup>4</sup> Data for **5a** were collected at Nagoya University on a Rigaku PILATUS diffractometer using Mo K<sub>α</sub> radiation ( $\lambda = 0.71075$  Å) at -150 °C, and refined using the same programs and methods. The assignment of hydrogen atom positions was based on the sp<sup>2</sup> or sp<sup>3</sup> hybridization geometries of their attached carbon atoms and were given thermal parameters 20% greater than those of their parent atoms. **Cyclic Voltammetry** was performed using a CH Instruments electrochemical analyzer and referenced to Ag/AgCl.

### 1.2 Computational Methods

All calculations have been done by using density-functional theory (DFT) as implemented in the real-space code-package GPAW<sup>5</sup> (Grid-based projector-augmented wave method). Scalar-relativistic corrections for gold are included in GPAW setups. Two exchange-correlation-functionals were used, the Perdew–Burke–Ernzerhof (PBE)<sup>6</sup> and GLLB-SC.<sup>7</sup> The experimental crystal structure was used as a starting point for the calculations. The initial geometry was first relaxed with PBE, 0.2 Å grid spacing and 0.05 eV/Å convergence criterion for the maximum forces acting on atoms in cluster. After relaxation a ground state calculation was done with GLLB-SC functional and 0.25 Å grid spacing, which was used for all further analysis. The electronic density of states was analysed via projections to atomic Au(s), Au(p) and Au(d) symmetries. Optical absorption spectra were calculated by using linear-response time-dependent density functional theory lr-TDDFT,<sup>8</sup> PBE functional in the kernel but with GLLB-SC wave functions and energies. Finally, dipole transition contribution maps (DTCM) were solved for analyzing the peaks in the spectrum by using time-dependent density functional perturbation theory TD-DFPT.<sup>9</sup>

## 2. Synthetic Procedures

### 3-(2-bromoethyl)-1-isopropylbenzimidazolium bromide (2a).

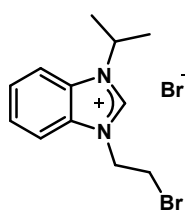

A solution of 1-isopropyl-benzimidazole (1.0 g, 6.6 mmol) and 1,2-dibromoethane (5.4 mL, 62.4 mmol) in acetonitrile (30 mL) was refluxed for 24 hours at 90 °C, and then cooled to room temperature. The white precipitate that formed was removed by filtration through a pad of Celite. The filtrate was collected and solvent was removed by rotary evaporation. Product was purified by silica column chromatography with CH<sub>2</sub>Cl<sub>2</sub>-MeOH (9:1) affording a sticky white solid after concentration of appropriate fractions and drying in vacuum. Yield 1.3 g (56%). <sup>1</sup>H NMR (400 MHz, CDCl<sub>3</sub>) δ 11.21 (s, 1H), 7.90 (m, 1H), 7.76 (m, 1H), 7.65 (m, 2H), 5.24 (t, *J* = 5.6 Hz, 2H), 4.99 (sept, *J* = 6.8 Hz, 1H), 4.08 (t, *J* = 6.0 Hz, 2H), 1.83 (d, *J* = 6.8 Hz, 6H) ppm. <sup>13</sup>C NMR (100 MHz, CDCl<sub>3</sub>) δ 141.7, 132.1, 130.4, 127.5, 127.3, 113.9, 113.5, 52.1, 48.7, 30.4, 22.4 ppm. HRMS (ESI+) *m/z* calculated for C<sub>12</sub>H<sub>16</sub>Br<sub>2</sub>N<sub>2</sub> [M]<sup>+</sup>: 267.0491, found: 267.0486. EA: (Calculated) C 41.41, H 4.63, N 8.05. (Observed) C 41.09, H 4.56, N 8.07.

### 3-(3-bromopropyl)-1-isopropylbenzimidazolium bromide (2b).

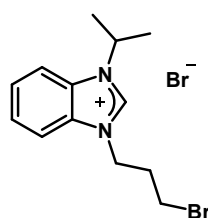

A solution of 1-isopropyl-benzimidazole (0.25 g, 1.6 mmol) and 1,3-dibromopropane (2.0 mL, 19.6 mmol) was heated at 90 °C for 16 hours at ambient conditions. White precipitate that formed was removed by filtration through a pad of Celite. The filtrate was collected and solvent removed by rotary evaporation. The product was purified by silica column chromatography with CH<sub>2</sub>Cl<sub>2</sub>-MeOH (9:1) to afford a white sticky solid after concentration of appropriate fractions and drying in vacuo. Yield 0.69 (61%). <sup>1</sup>H NMR (600 MHz, CDCl<sub>3</sub>) δ 11.24 (s, 1H), 7.85 (m, 1H), 7.78 (m, 1H), 7.63 (m, 2H), 4.99 (sept, *J* = 6.8 Hz, 1H), 4.91 (t, *J* = 7.2 Hz, 2H), 3.56 (t, *J* = 6.0 Hz, 2H), 2.67 (m, 2H), 1.79 (d, *J* = 6.7 Hz, 6H) ppm. <sup>13</sup>C NMR (151 MHz, CDCl<sub>3</sub>) δ 131.77, 130.51, 127.42, 127.24, 113.64, 113.29, 77.37, 76.95, 52.00, 45.88, 32.32, 29.92, 22.33 ppm. HRMS (ESI+) *m/z* calculated for C<sub>13</sub>H<sub>18</sub>BrN<sub>2</sub><sup>+</sup> [M]<sup>+</sup>: 281.0648, found: 281.0637. EA: (Calculated) C 43.12, H 5.01, N 7.74. (Observed) C 43.10, H 4.97, N 7.40.

### 3-(2-(acetylthio)ethyl)-1-isopropylbenzimidazolium bromide (3a).

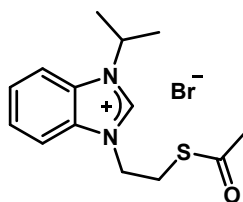

A mixture of **2a** (0.55 g, 1.6 mmol) and potassium thioacetate (0.22 g, 1.9 mmol) was suspended in acetonitrile (20 mL) and stirred overnight at room temperature. The resulting yellow suspension was filtered through a pad of Celite and the solvent was removed by rotary evaporation affording the crude product as viscous yellow oil. The crude product was dissolved in a small amount of CH<sub>2</sub>Cl<sub>2</sub> and triturated three times with diethyl ether at cold temperature, which afforded the product as a pale orange solid. Yield 0.43 g (80 %). <sup>1</sup>H NMR (400 MHz, CDCl<sub>3</sub>) δ 11.14 (s, 1H), 7.98 (m, 1H), 7.75 (m, 1H), 7.57 (m, 2H), 4.96 (sept, *J* = 4.8 Hz, 1H), 4.80 (t, *J* = 4.8 Hz, 2H), 3.45 (t, *J* = 4.4 Hz, 2H), 2.19 (s, 3H), 1.72 (d, *J* = 4.4 Hz, 6H) ppm. <sup>13</sup>C NMR (100 MHz, CDCl<sub>3</sub>) δ 195.5, 141.5, 131.7, 130.3, 127.2, 127.0, 113.45, 113.42, 51.7, 46.2, 30.4, 28.5, 22.1 ppm. HRMS (ESI+) *m/z* calculated for C<sub>14</sub>H<sub>19</sub>N<sub>2</sub>OS [M]<sup>+</sup>: 263.1213, found: 263.1209. EA: (Calculated) C 48.98, H 5.58, N 8.16. (Observed) C 49.13, H 5.62, N 8.08.

### 3-(3-(acetylthio)propyl)-1-isopropylbenzimidazolium bromide (3b).

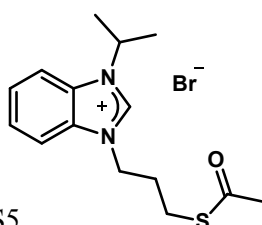

A mixture of **2b** (0.69 g, 1.91 mmol) and potassium thioacetate (0.26 g, 1.9 mmol) was suspended in acetonitrile (25 mL) and stirred overnight at room temperature. The resulting white suspension was filtered through a pad of Celite, and the solvent was removed by rotary evaporation, affording the crude product as a brown viscous oil. The crude product was dissolved in

small amount of  $\text{CH}_2\text{Cl}_2$  and triturated three times with diethyl ether at cold temperature, which afforded the product as a pale orange solid. Yield 0.63 g (96%).  $^1\text{H}$  NMR (600 MHz,  $\text{CDCl}_3$ )  $\delta$  11.13 (s, 1H), 7.78 (m, 1H), 7.74 (m, 1H), 7.60 (m, 2H), 4.99 (sept,  $J = 6.8$  Hz, 1H), 4.76 (t,  $J = 7.2$  Hz, 2H), 4.76 (t,  $J = 7.2$  Hz, 2H), 2.93 (t,  $J = 7.1$  Hz, 2H), 2.22 (s, 3H), 1.76 (d,  $J = 6.8$  Hz, 6H) ppm.  $^{13}\text{C}$  NMR (151 MHz,  $\text{CDCl}_3$ )  $\delta$  207.04, 195.54, 131.58, 130.58, 127.25, 127.12, 113.65, 113.24, 51.86, 46.16, 30.89, 30.64, 29.44, 25.64, 22.25 ppm. HRMS (ESI+)  $m/z$  calculated for  $\text{C}_{15}\text{H}_{21}\text{N}_2\text{OS}^+$   $[\text{M}]^+$ : 277.1369, found: 277.1368. EA: (Calculated) C 50.42, H 5.92, N 7.84. (Observed) C 50.18, H 6.01, N 7.63.

### (3-(2-(acetylthio)ethyl)-1-isopropylbenzimidazole)gold bromide (4a).

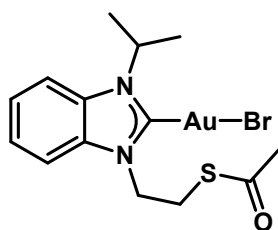

A mixture of **3a** (0.20 g, 0.6 mmol),  $\text{Au}(\text{SMe}_2)\text{Cl}$  (0.18 g, 0.6 mmol) and  $\text{K}_2\text{CO}_3$  (0.26 g, 1.9 mmol) was suspended in acetone and heated at  $60^\circ\text{C}$  for 2 hours. After cooling to room temperature, the reaction mixture was filtered through a pad of Celite. The filtrate was collected and the solvent was removed by rotary evaporation, which afforded the product as a pale orange crystalline solid. Yield 0.29 g (94 %).  $^1\text{H}$  NMR (400 MHz,  $\text{CDCl}_3$ )  $\delta$  7.76 (d,  $J = 7.2$  Hz, 1H), 7.62 (d,  $J = 6.0$  Hz, 1H), 7.41 (quint-d,  $J = 6.4$  and  $J = 0.8$  Hz, 2H), 5.41 (sept,  $J = 6.8$  Hz, 1H), 4.58 (t,  $J = 7.6$  Hz, 2H), 3.30 (t,  $J = 7.6$  Hz, 2H), 2.35 (s, 3H), 1.71 (d,  $J = 7.6$  Hz, 6H) ppm.  $^{13}\text{C}$  NMR (100 MHz,  $\text{CDCl}_3$ )  $\delta$  195.5, 180.0, 133.6, 131.6, 124.8, 124.4, 112.9, 112.1, 54.0, 47.7, 30.7, 28.5, 21.9 ppm. HRMS (ESI+)  $m/z$  calculated for  $\text{C}_{14}\text{H}_{18}\text{AuON}_2\text{SBrNa}$   $[\text{M}+\text{Na}]^+$ : 560.9881, found: 560.9879. EA: (Calculated) C 31.18, H 3.36, N 5.20. (Observed) C 31.35, H 3.42, N 5.08.

### 3-(2-(acetylthio)propyl)-1-isopropylbenzimidazole)gold bromide (4b).

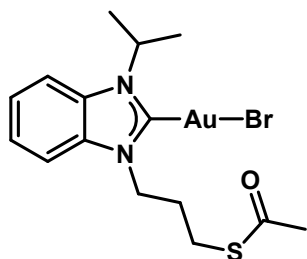

A mixture of **3b** (0.28 g, 0.79 mmol),  $\text{Au}(\text{SMe}_2)\text{Cl}$  (0.24 g, 0.80 mmol) and  $\text{K}_2\text{CO}_3$  (0.33 g, 2.4 mmol) was suspended in acetone and heated at  $60^\circ\text{C}$  for 2 hours. After cooling to room temperature, the reaction mixture was filtered through a pad of Celite. The filtrate was collected and volatiles were removed by rotary evaporation. The crude product was purified by silica column chromatography with  $\text{CH}_2\text{Cl}_2$ -MeOH (9:1) which afforded the product as a pale beige solid after concentration of appropriate fractions. Yield 0.28 g (66%).  $^1\text{H}$  NMR (600 MHz,  $\text{CDCl}_3$ )  $\delta$  7.64 (m, 1H), 7.49 (m, 1H), 7.41 (m, 2H), 5.45 (sept,  $J = 6.8$  Hz, 1H), 4.54 (t,  $J = 7.3$  Hz, 2H), 2.93 (t,  $J = 6.9$  Hz, 2H), 2.34 (s, 3H), 2.27 – 2.20 (m, 2H), 1.73 (d,  $J = 7.0$  Hz, 6H) ppm.  $^{13}\text{C}$  NMR (151 MHz,  $\text{CDCl}_3$ )  $\delta$  195.46, 180.48, 133.69, 131.80, 124.66, 124.37, 113.11, 111.71, 54.15, 47.50, 30.89, 29.84, 26.11, 21.94 ppm. HRMS (ESI+)  $m/z$  calculated for  $\text{C}_{15}\text{H}_{20}\text{AuBrN}_2\text{OSNa}^+$   $[\text{M}+\text{Na}]^+$ : 575.0043, found: 575.0048. EA: (Calculated) C 32.56, H 3.64, N 5.06. (Observed) C 33.45, H 3.89, N 4.86.

### [(NHC-S)<sub>4</sub>Au<sub>6</sub>]Br<sub>2</sub> (**5a**).

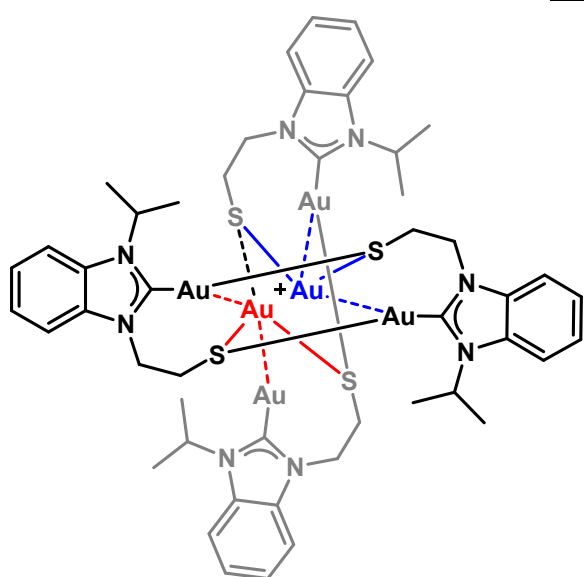

**2+** To a degassed mixture of **3** (0.16 g, 0.30 mmol) in methanol (8 mL) was added degassed 2 M aqueous HBr solution (3 mL, 6 mmol) with stirring. The reaction mixture was stirred at 65 °C under argon overnight, which resulted in formation of white precipitate. Most of the methanol was removed by rotary evaporation and the aqueous solution was diluted with H<sub>2</sub>O and extracted two times with CH<sub>2</sub>Cl<sub>2</sub>. The combined organic layers were washed with brine and dried with anhydrous Na<sub>2</sub>SO<sub>4</sub>. The solvent was removed by rotary evaporation and the yellowish solid was washed with a mixture of CHCl<sub>3</sub>-CCl<sub>4</sub> to remove any impurities. Yield 0.10 g (63% based on NHC, 94% based on Au) as a white powdery solid. <sup>1</sup>H NMR (400 MHz, CD<sub>3</sub>OD) δ 7.91 (d, *J* = 4.8 Hz, 1H), 7.62 (d, *J* = 5.6 Hz,

1H), 7.43 (quint, *J* = 4.4 Hz, 2H), 5.55 (sept, *J* = 4.8 Hz, 1H), 5.14 (dd, *J* = 3.6 and *J* = 6.0 Hz, 1H, -NCHH-), 5.03 (dd, *J* = 6.8 and *J* = 2.8 Hz, 1H, -NCHH-), 3.78 (dd, *J* = 3.6 and *J* = 6.0 Hz, 1H, -CHHSH), 3.29 (dd, *J* = 6.8 and *J* = 2.8 Hz, 1H, -CHHSH), 1.95 (d, *J* = 4.4 Hz, 3H), 1.77 (d, *J* = 4.8 Hz, 3H) ppm. <sup>13</sup>C NMR (100 MHz, CH<sub>3</sub>OD) δ 182.4, 134.8, 133.2, 126.1, 126.0, 115.2, 113.2, 56.7, 55.8, 32.6, 22.1, 22.0 ppm. HRMS (ESI+) *m/z* calculated for C<sub>48</sub>H<sub>60</sub>Au<sub>6</sub>N<sub>8</sub>S<sub>4</sub> [M-2Br]<sup>2+</sup>: 1029.0903, found: 1029.0910. EA: (Calculated) C 25.98, H 2.73, N 5.05, S 5.78. (Observed) C 25.87, H 2.84, N 5.86.

### Reaction of compound **4b** with HBr.

To a degassed mixture of **4b** (0.16 g, 0.29 mmol) in methanol (8 mL) was added a degassed 2 M aqueous HBr solution (3 mL, 6 mmol) with stirring. The reaction mixture was stirred at 65 °C under argon overnight, which resulted in formation of insoluble white precipitate.

### 3. Experimental data

#### 3.1 NMR Spectroscopy

##### 3.1.1 Figure S1: $^1\text{H}$ NMR spectrum (400 MHz, $\text{CDCl}_3$ ) of 2a.

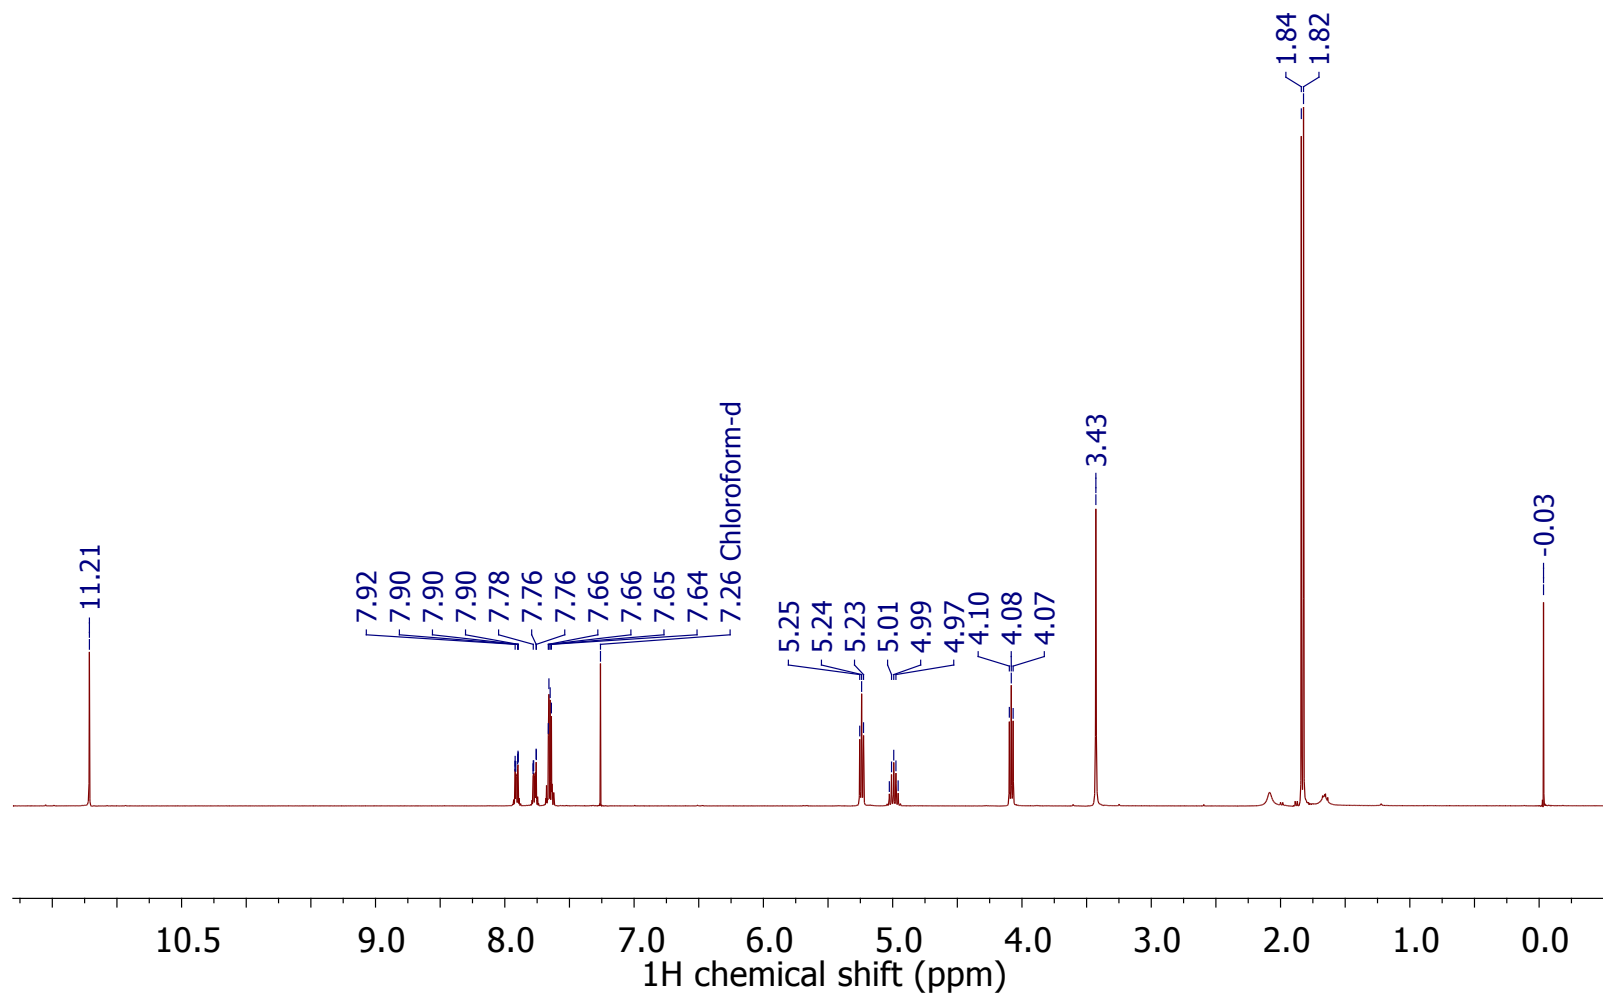



3.1.2 Figure S2:  $^{13}\text{C}\{^1\text{H}\}$  NMR spectrum (101 MHz,  $\text{CDCl}_3$ ) of 2a.

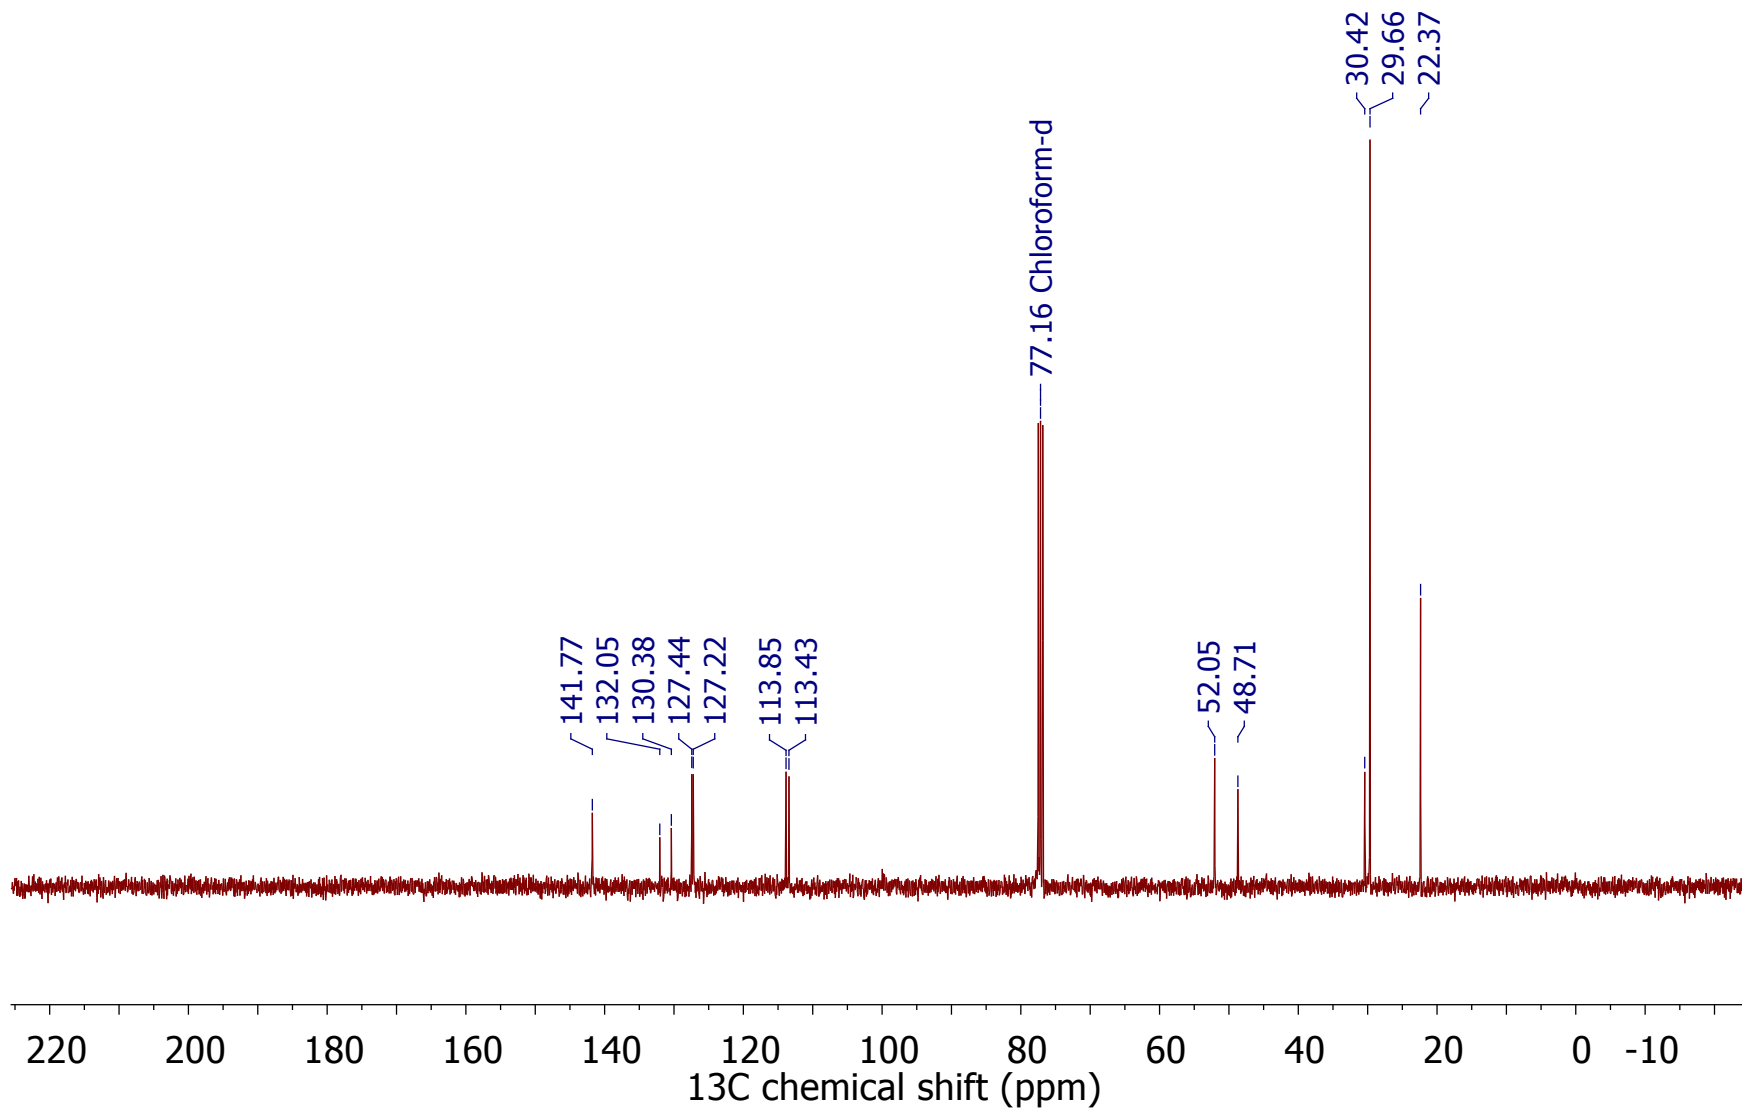

3.1.3 Figure S3:  $^1\text{H}$  NMR spectrum (600 MHz,  $\text{CDCl}_3$ ) of 2b.

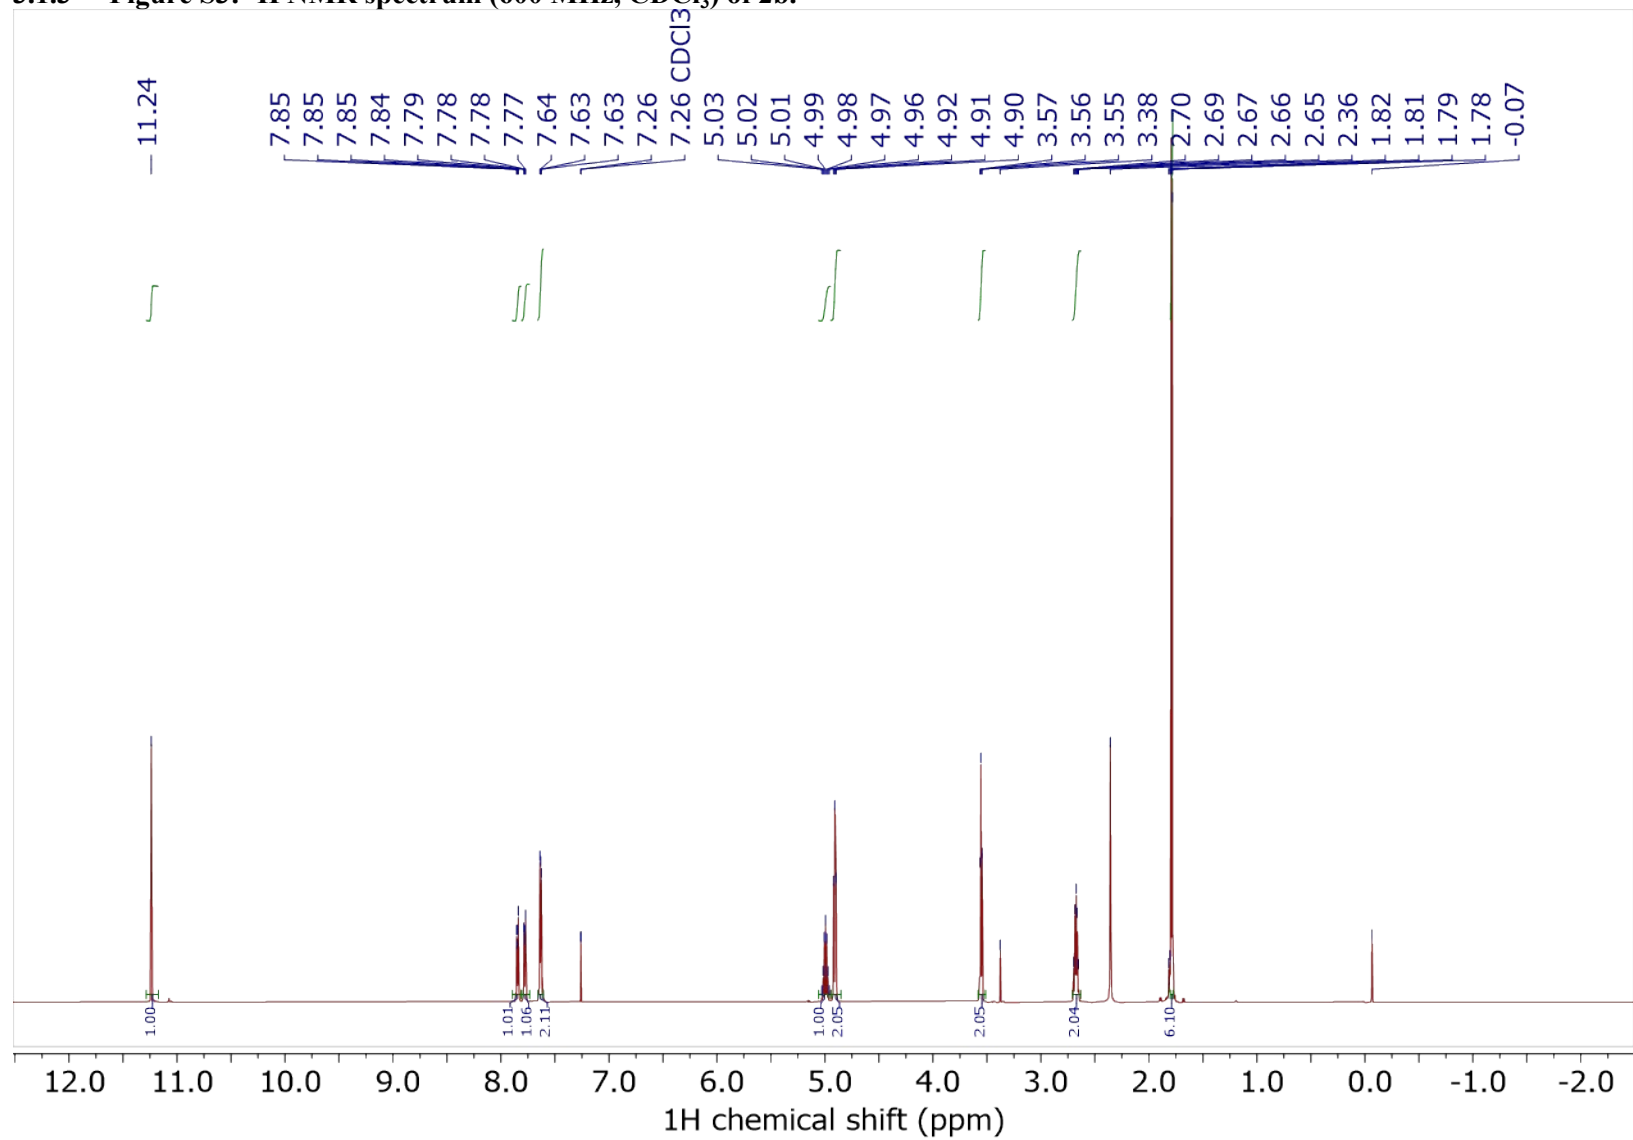

3.1.4 Figure S4:  $^{13}\text{C}\{^1\text{H}\}$  NMR spectrum (151 MHz,  $\text{CDCl}_3$ ) of 2b.

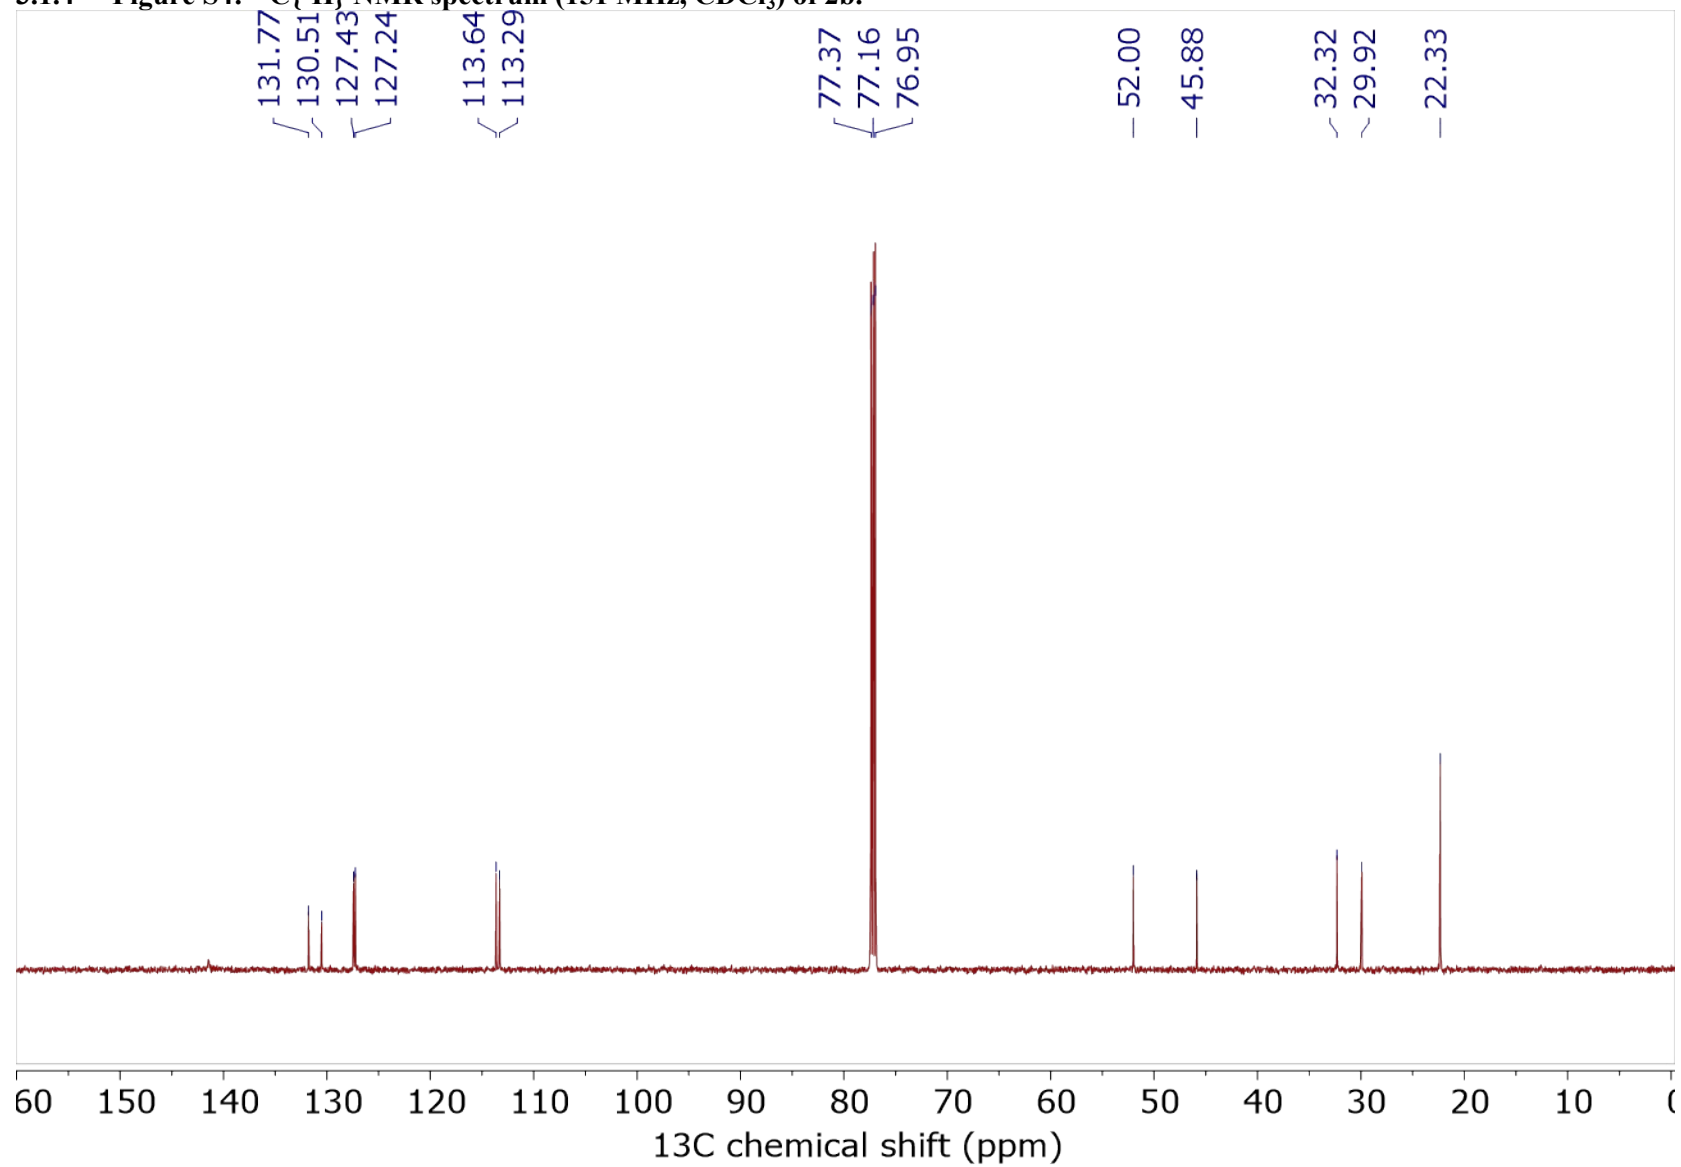

3.1.5 Figure S5:  $^1\text{H}$  NMR spectrum (400 MHz,  $\text{CDCl}_3$ ) of 3a.

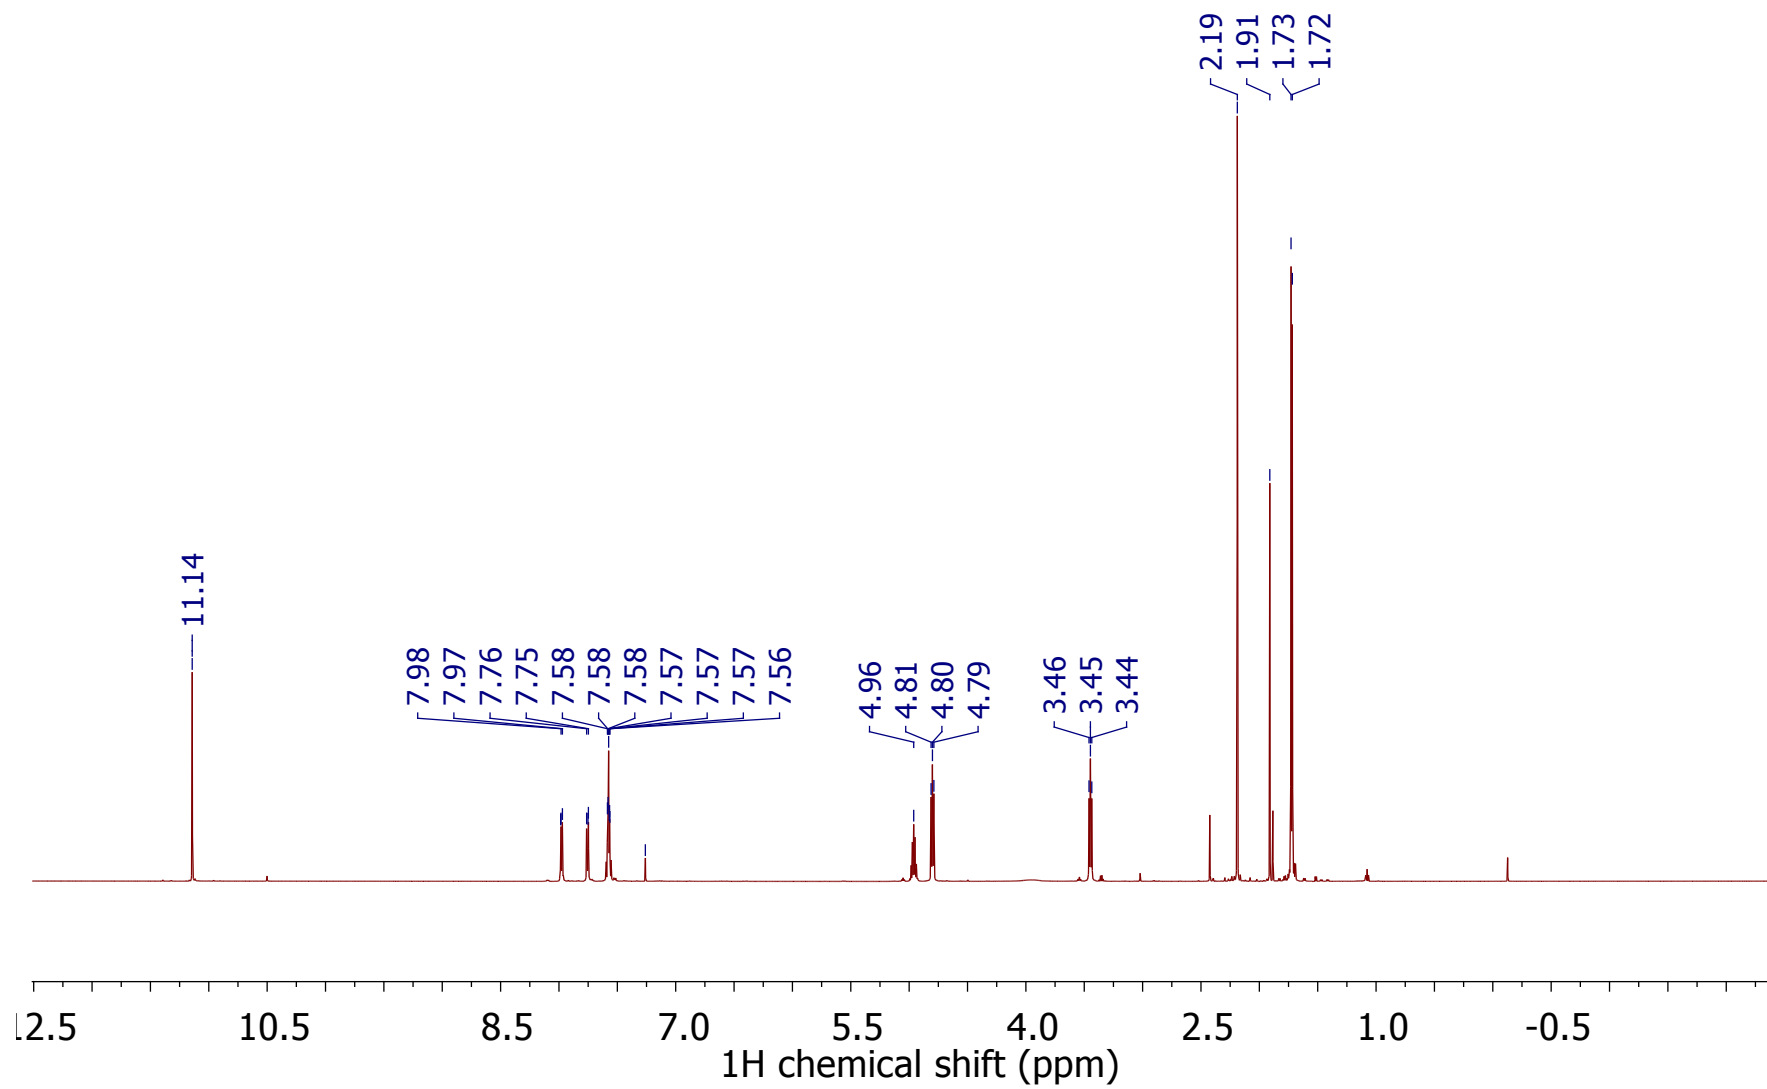

3.1.6 Figure S6:  $^{13}\text{C}\{^1\text{H}\}$  NMR spectrum (101 MHz,  $\text{CDCl}_3$ ) of 3a.

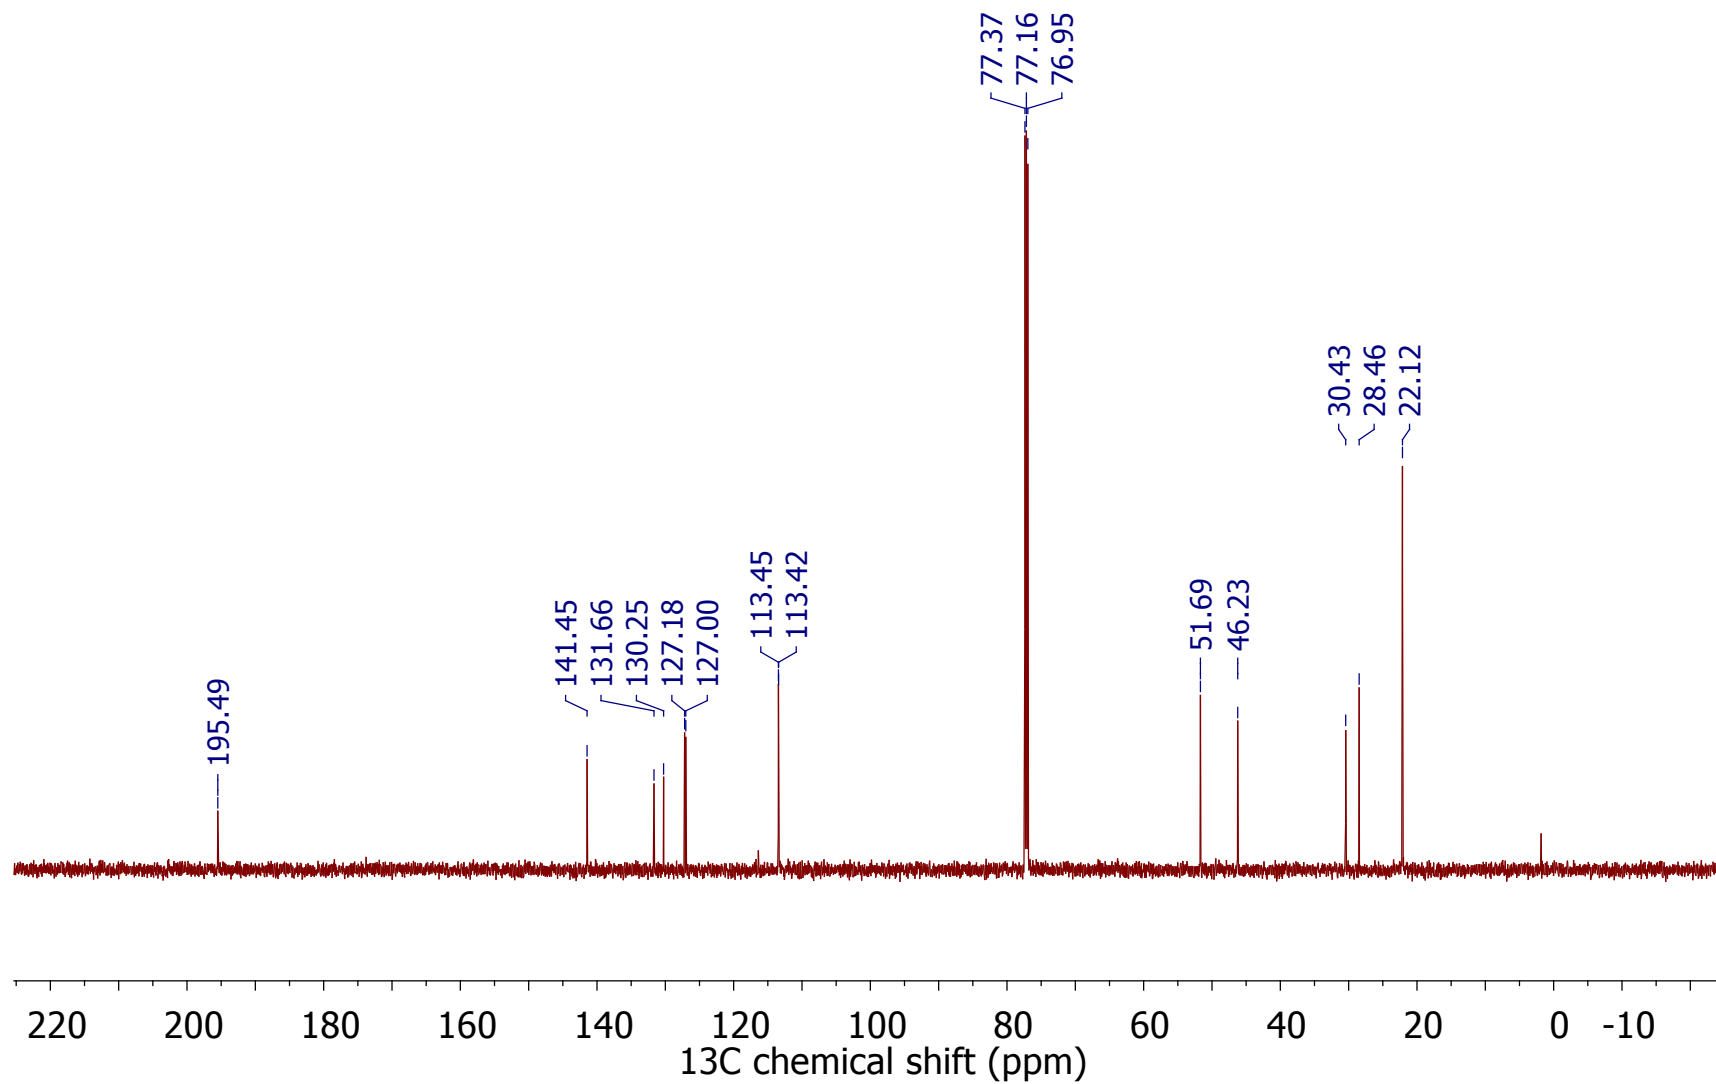

3.1.7 Figure S7: <sup>1</sup>H NMR spectrum (600 MHz, CDCl<sub>3</sub>) of 3b.

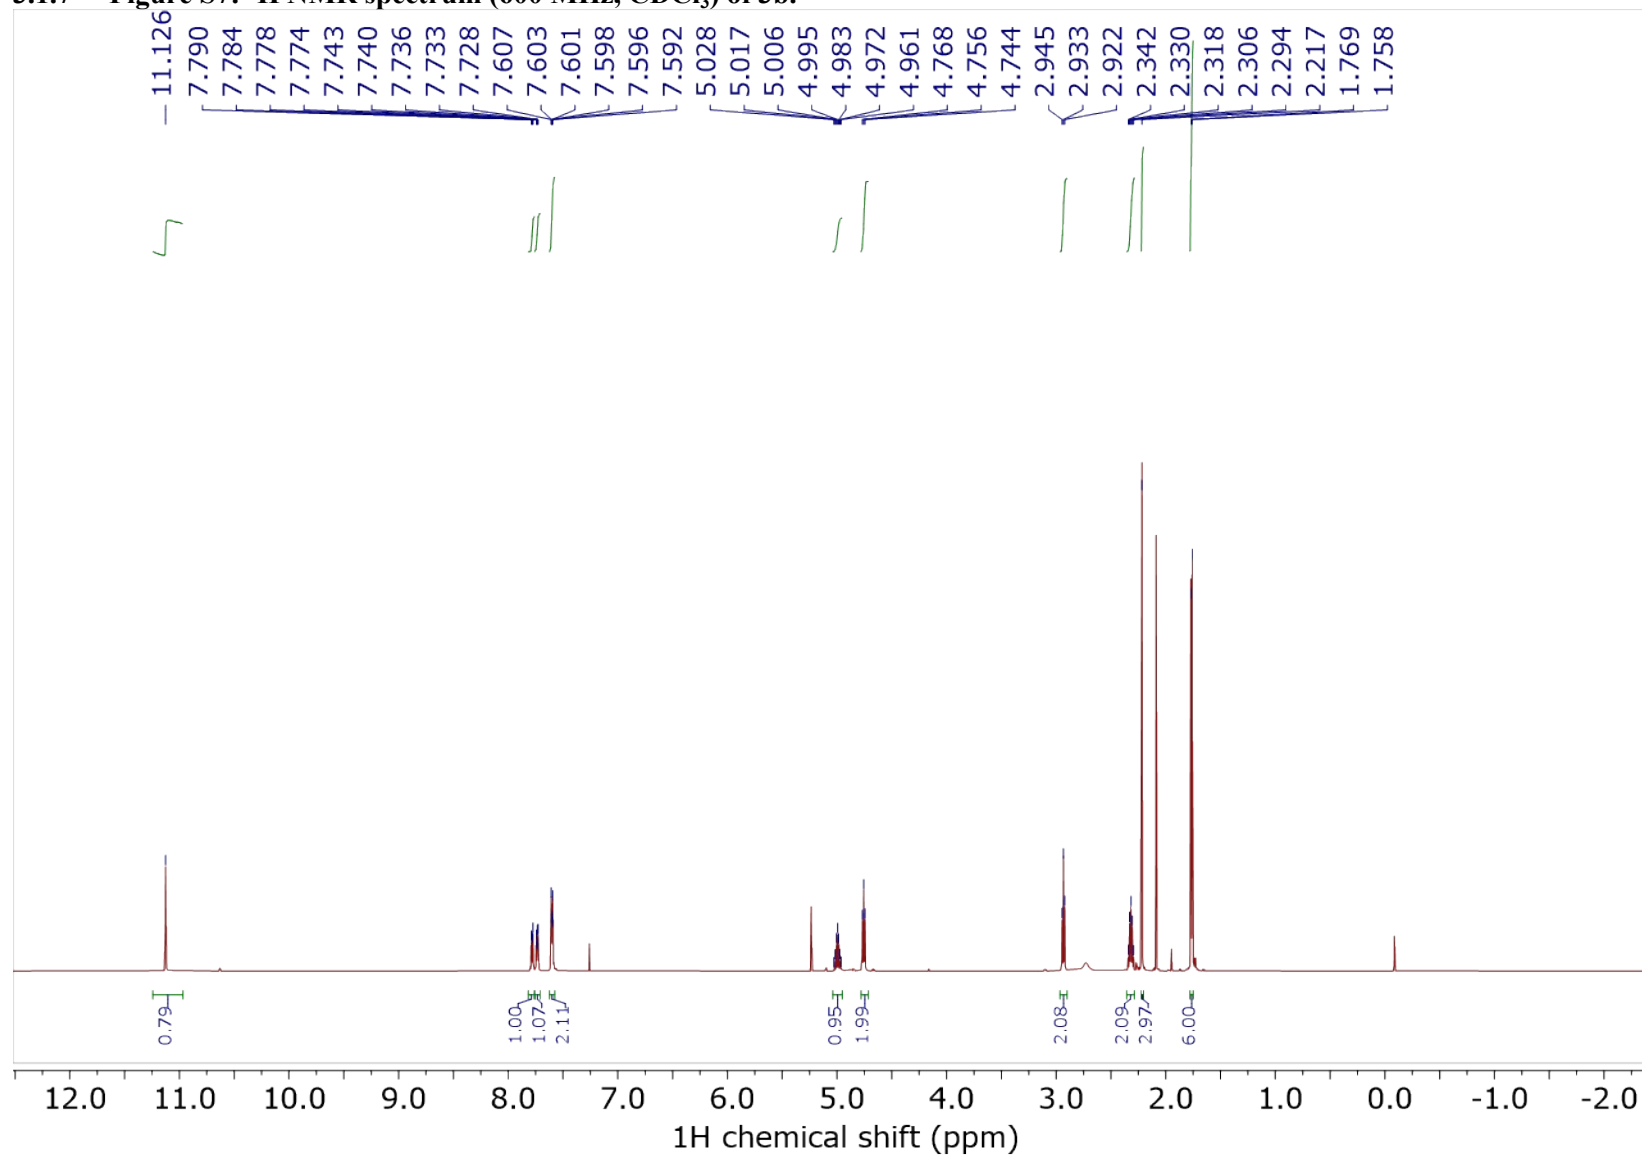

3.1.8 Figure S8:  $^{13}\text{C}\{^1\text{H}\}$  NMR spectrum (151 MHz,  $\text{CDCl}_3$ ) of 3b.

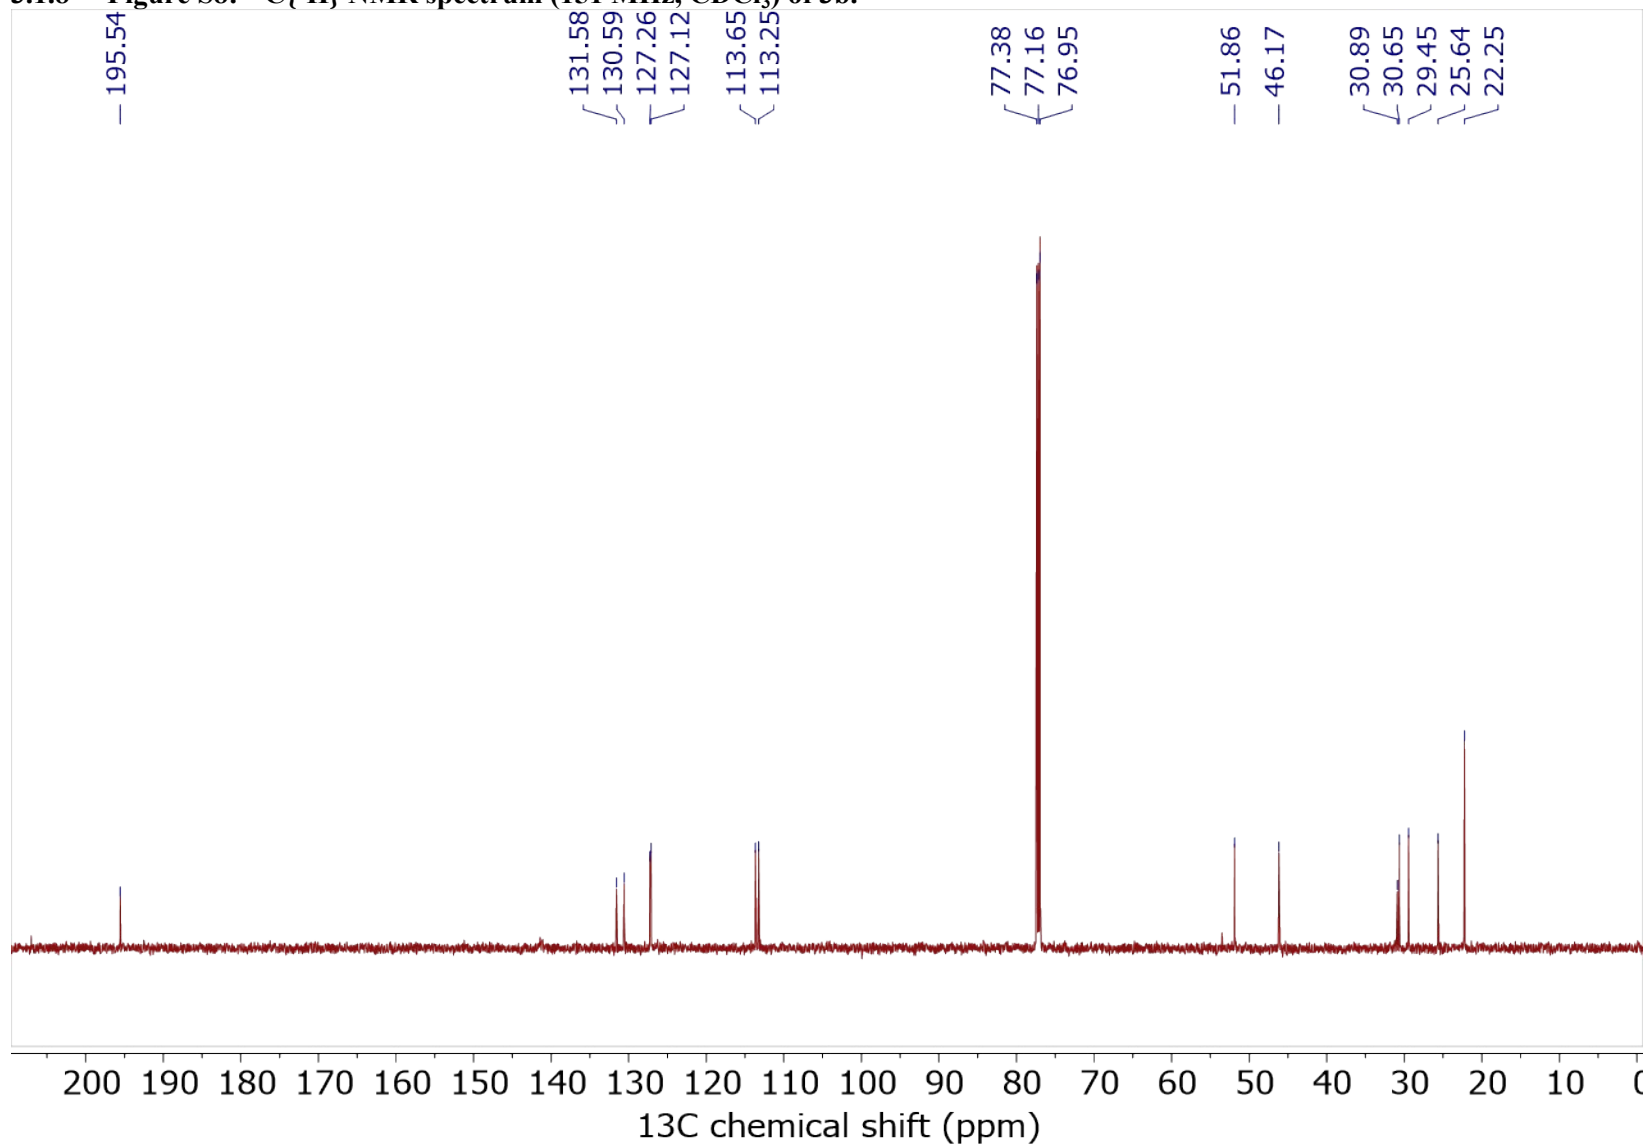

3.1.9 Figure S9:  $^1\text{H}$  NMR spectrum (400 MHz,  $\text{CDCl}_3$ ) of 4a.

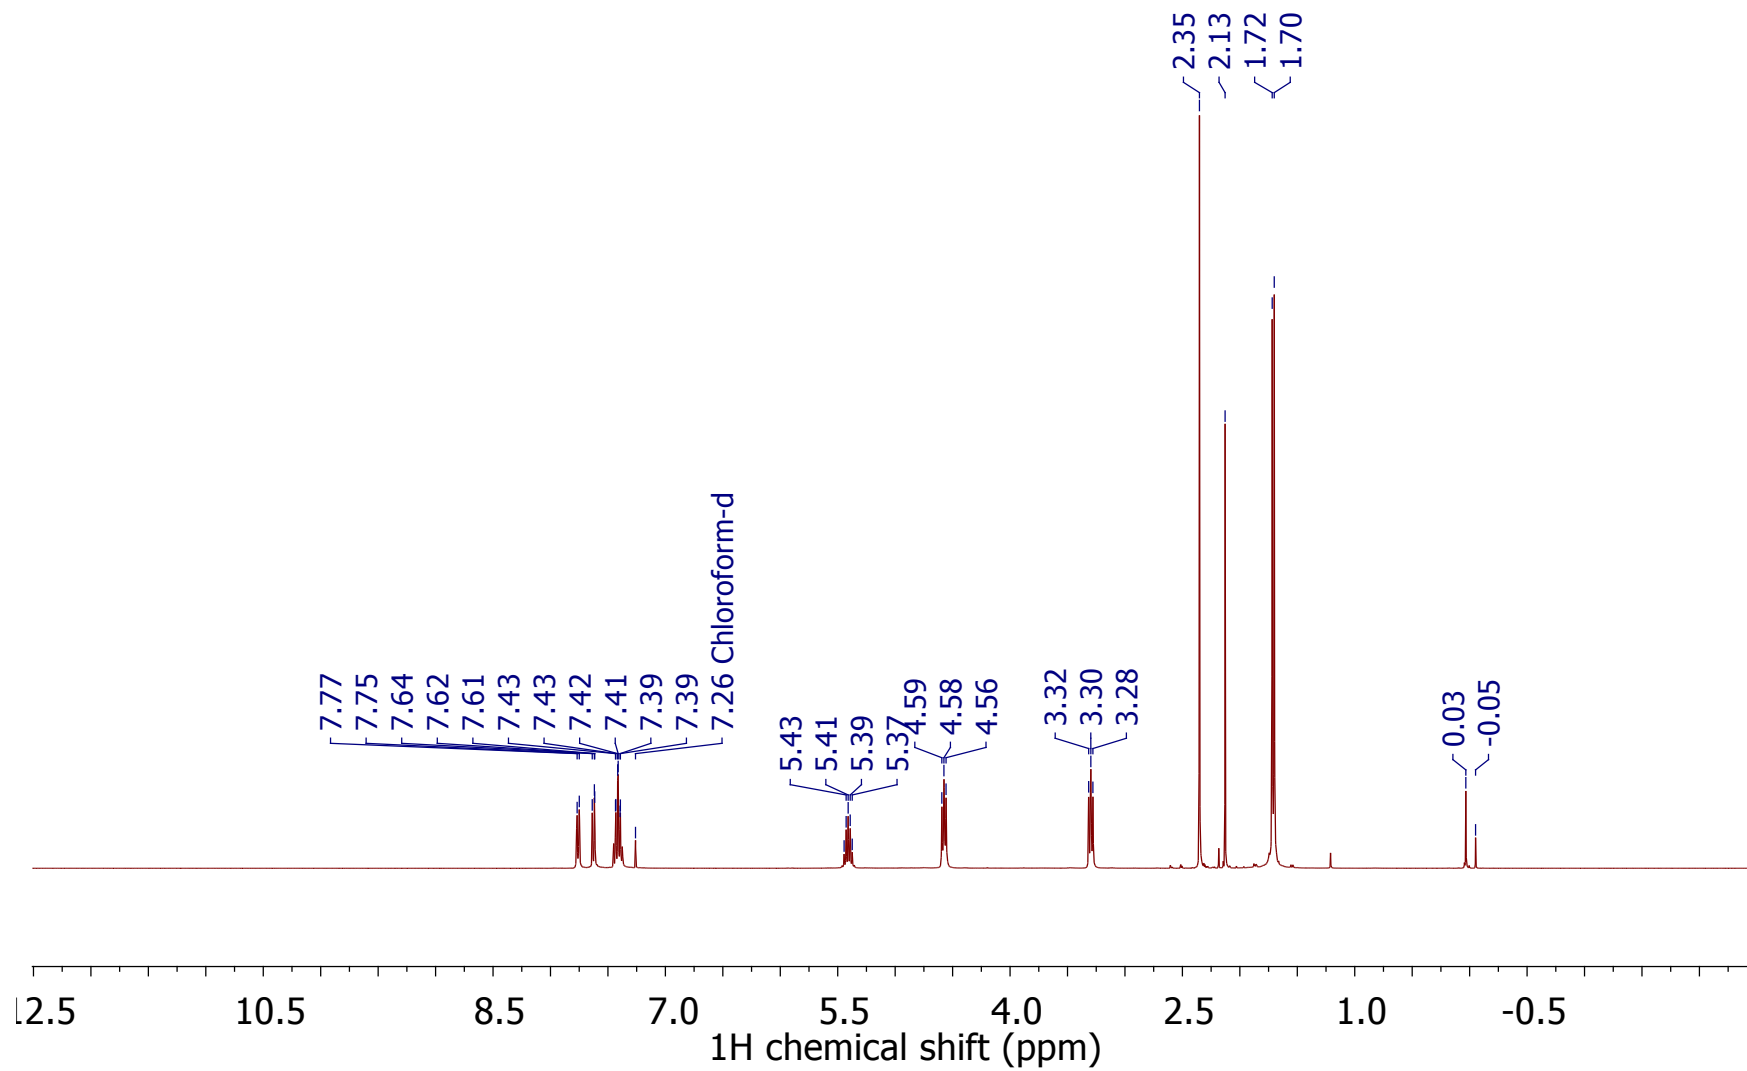



3.1.10 Figure S10:  $^{13}\text{C}\{^1\text{H}\}$  NMR spectrum (101 MHz,  $\text{CDCl}_3$ ) of 4a.

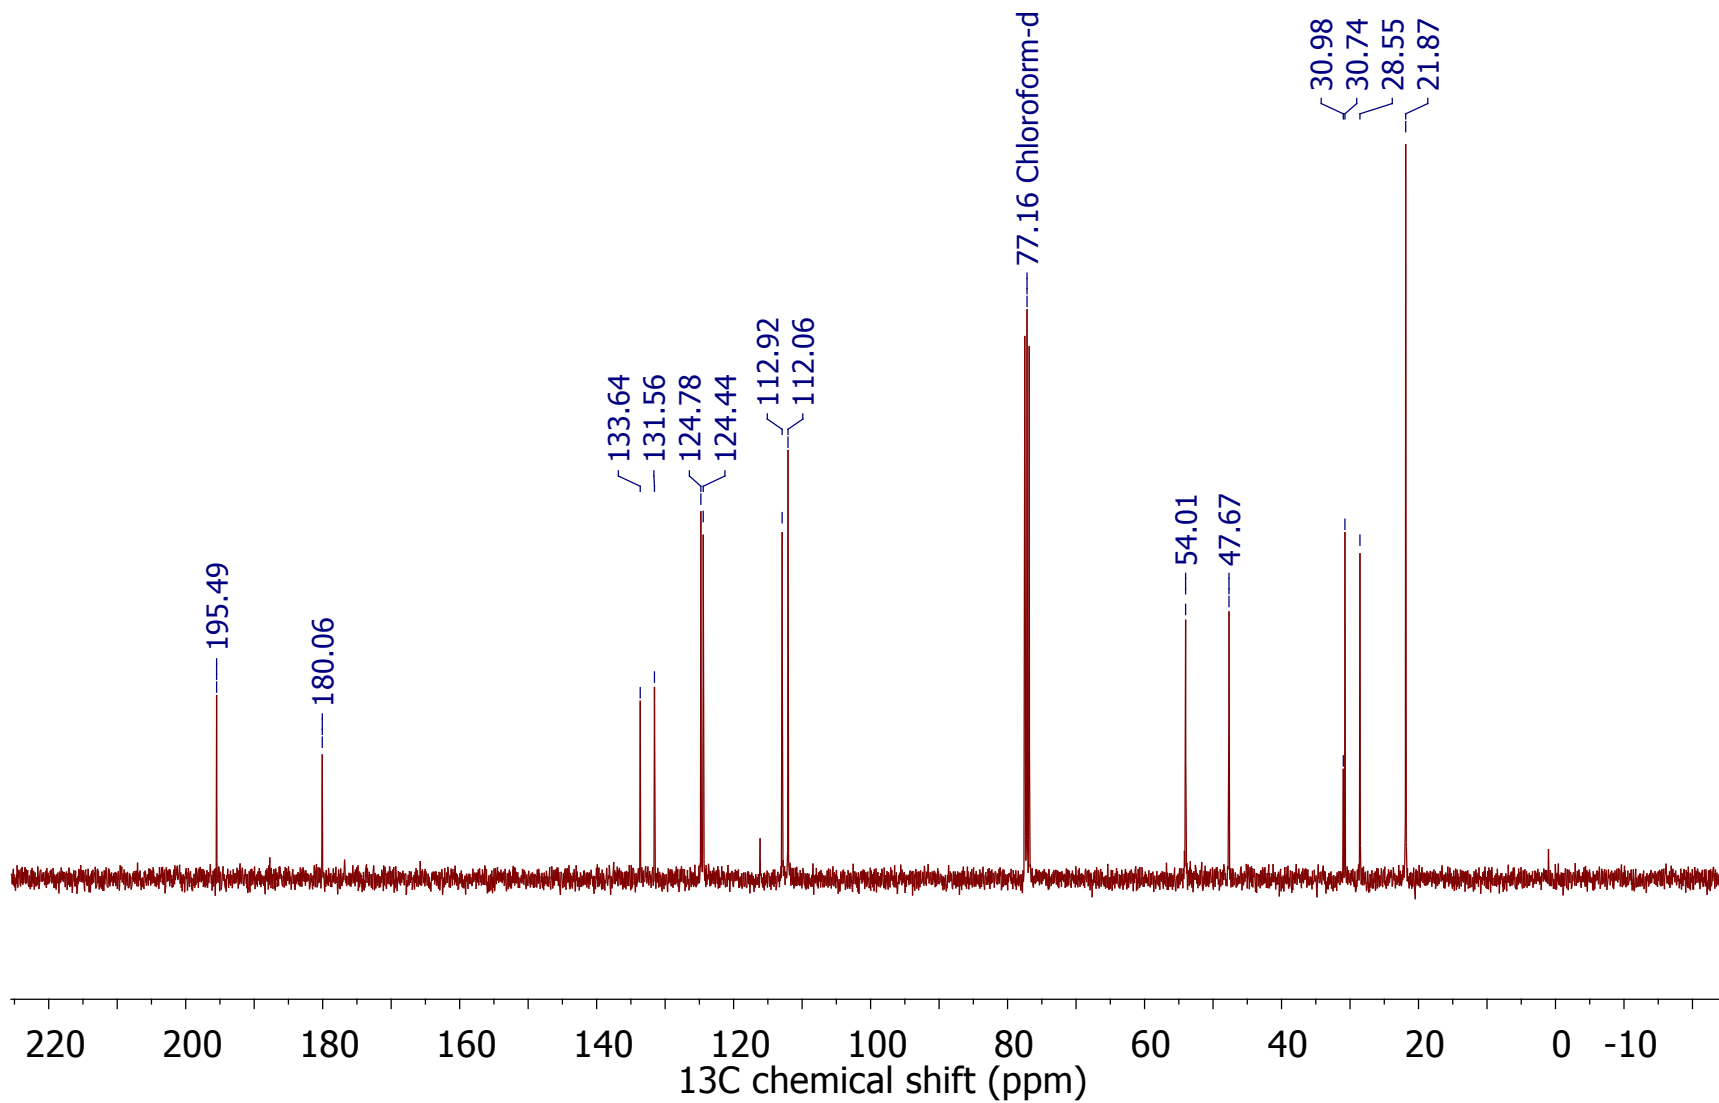

3.1.11 Figure S11: <sup>1</sup>H NMR spectrum (600 MHz, CDCl<sub>3</sub>) of 4b.

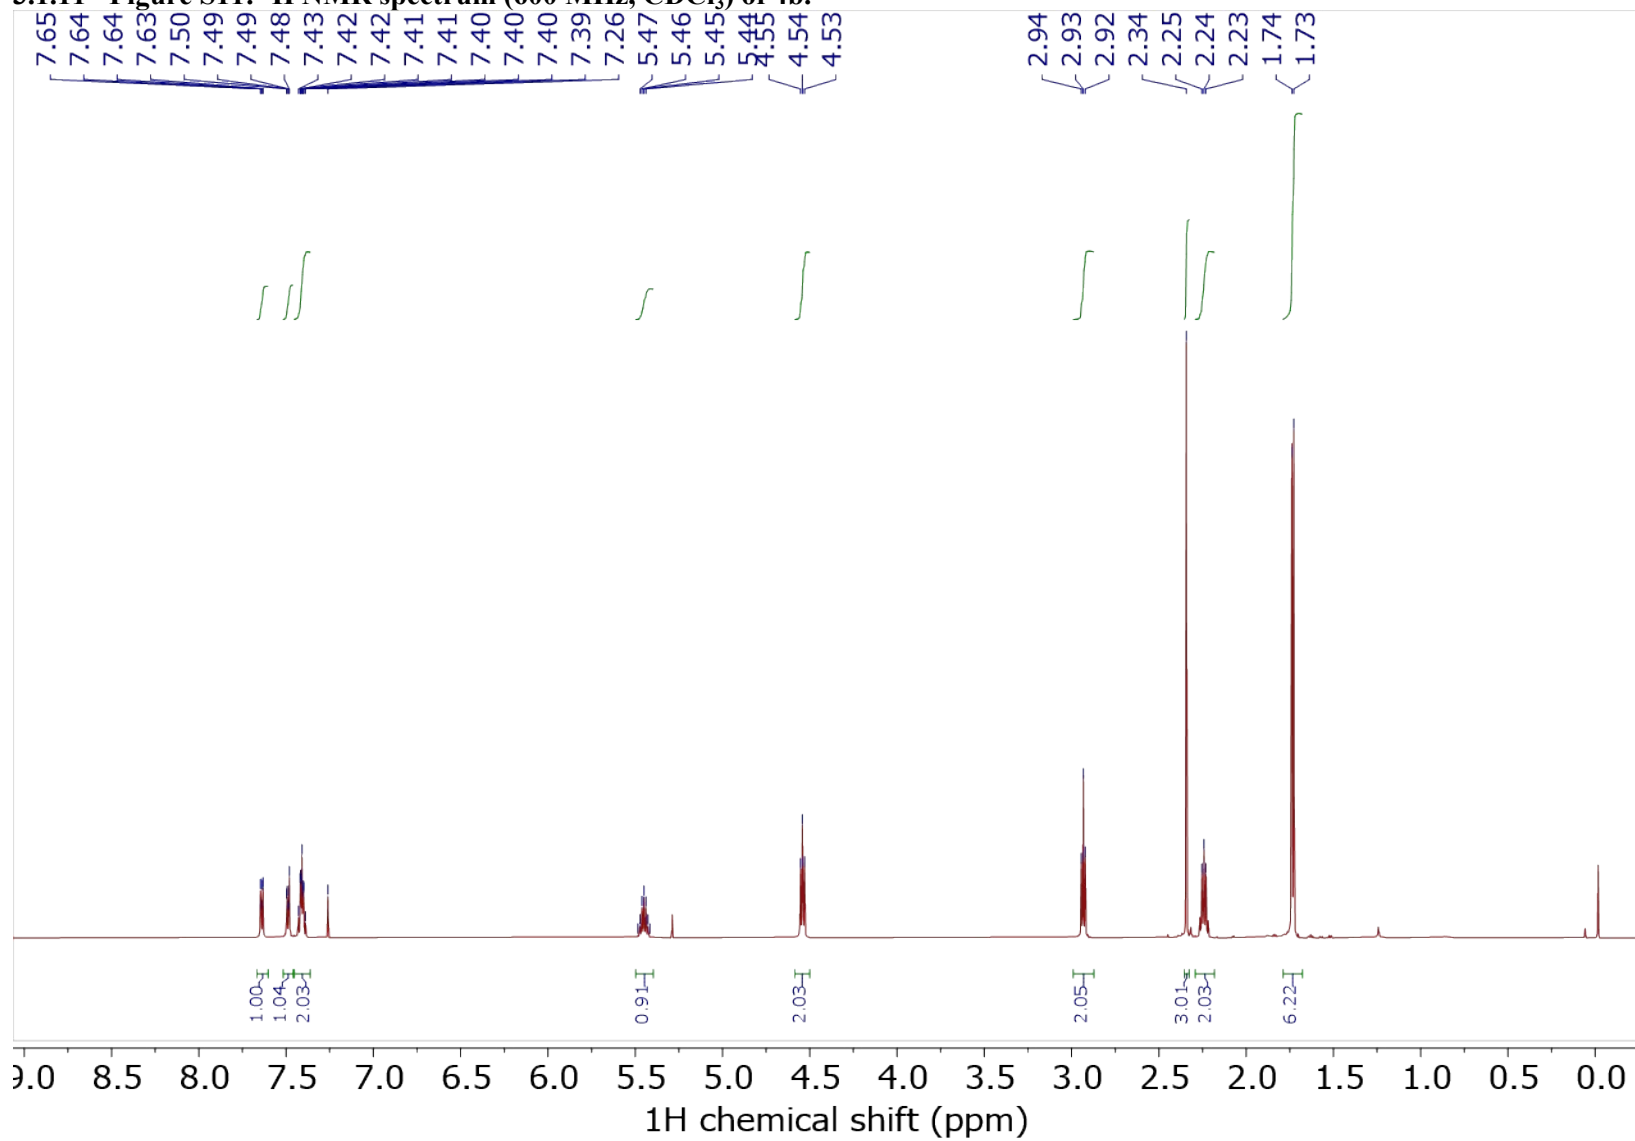

3.1.12 Figure S12:  $^{13}\text{C}\{^1\text{H}\}$  NMR spectrum (151 MHz,  $\text{CDCl}_3$ ) of 4b.

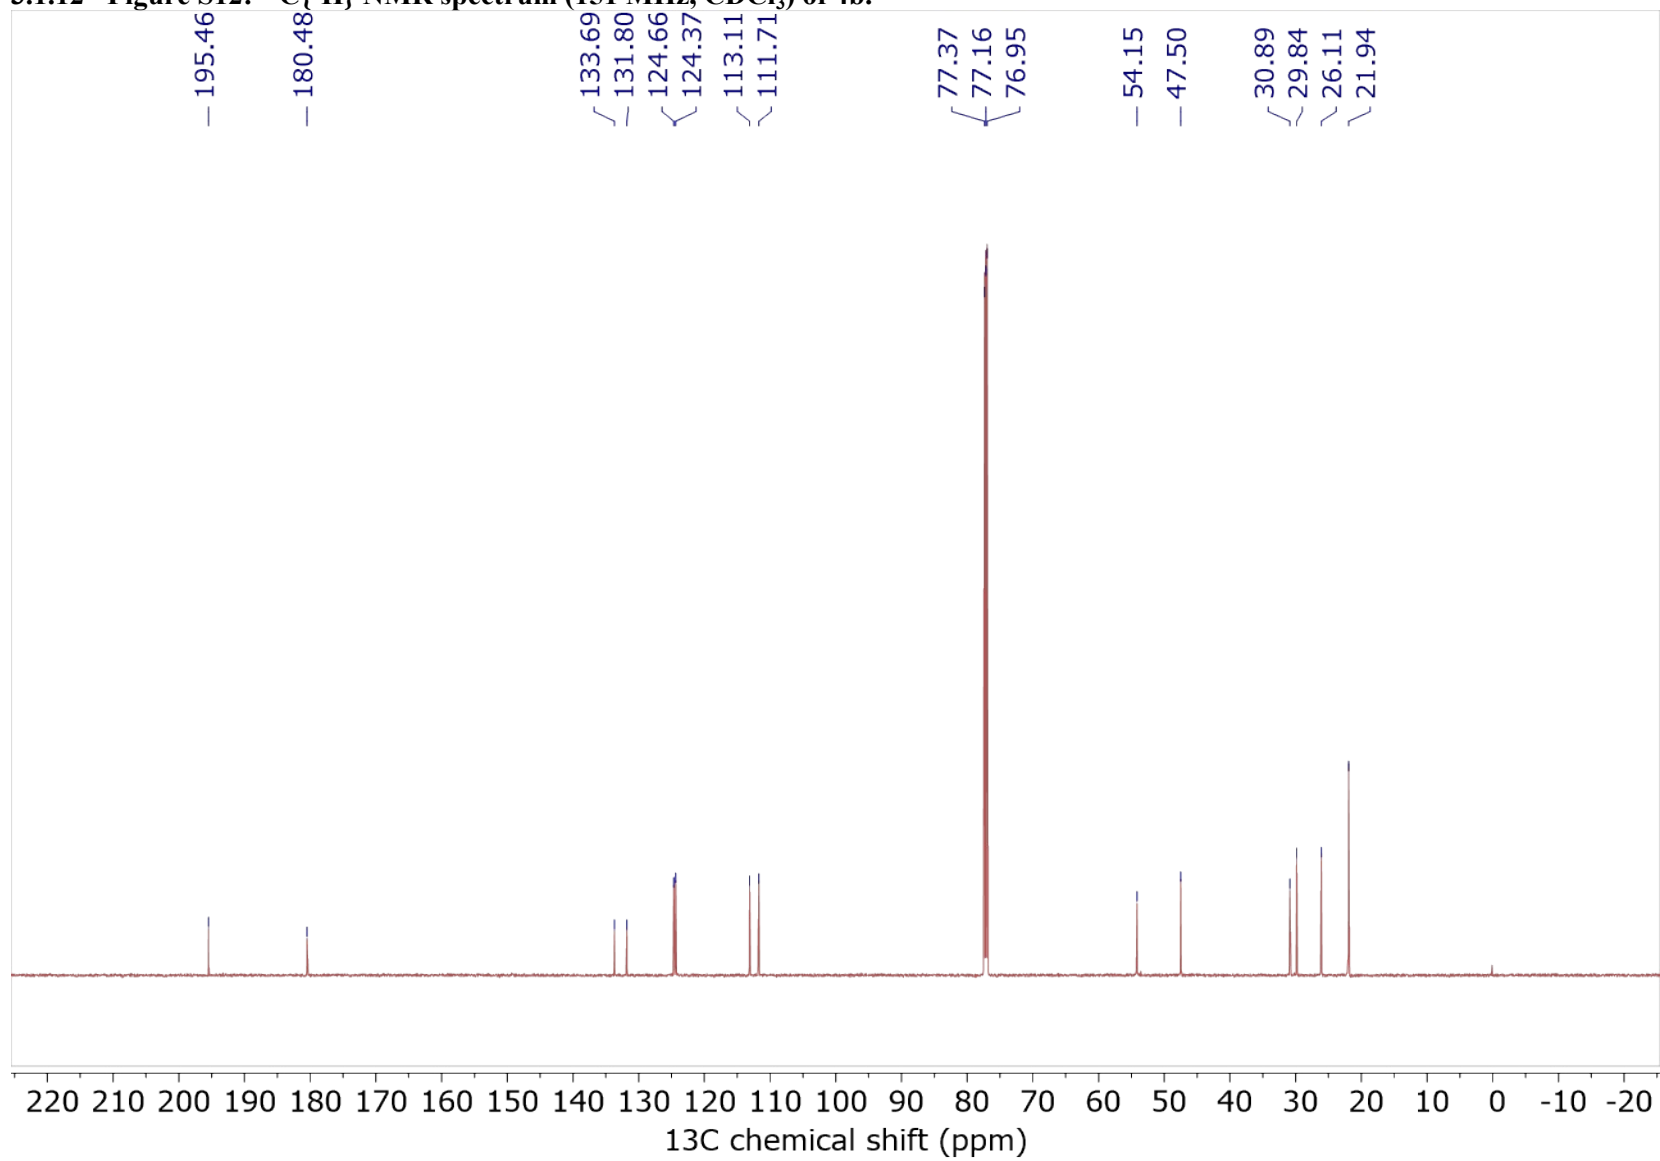

3.1.13 Figure S13:  $^1\text{H}$  NMR spectrum (400 MHz,  $\text{CD}_3\text{OD}$ ) of 5a.

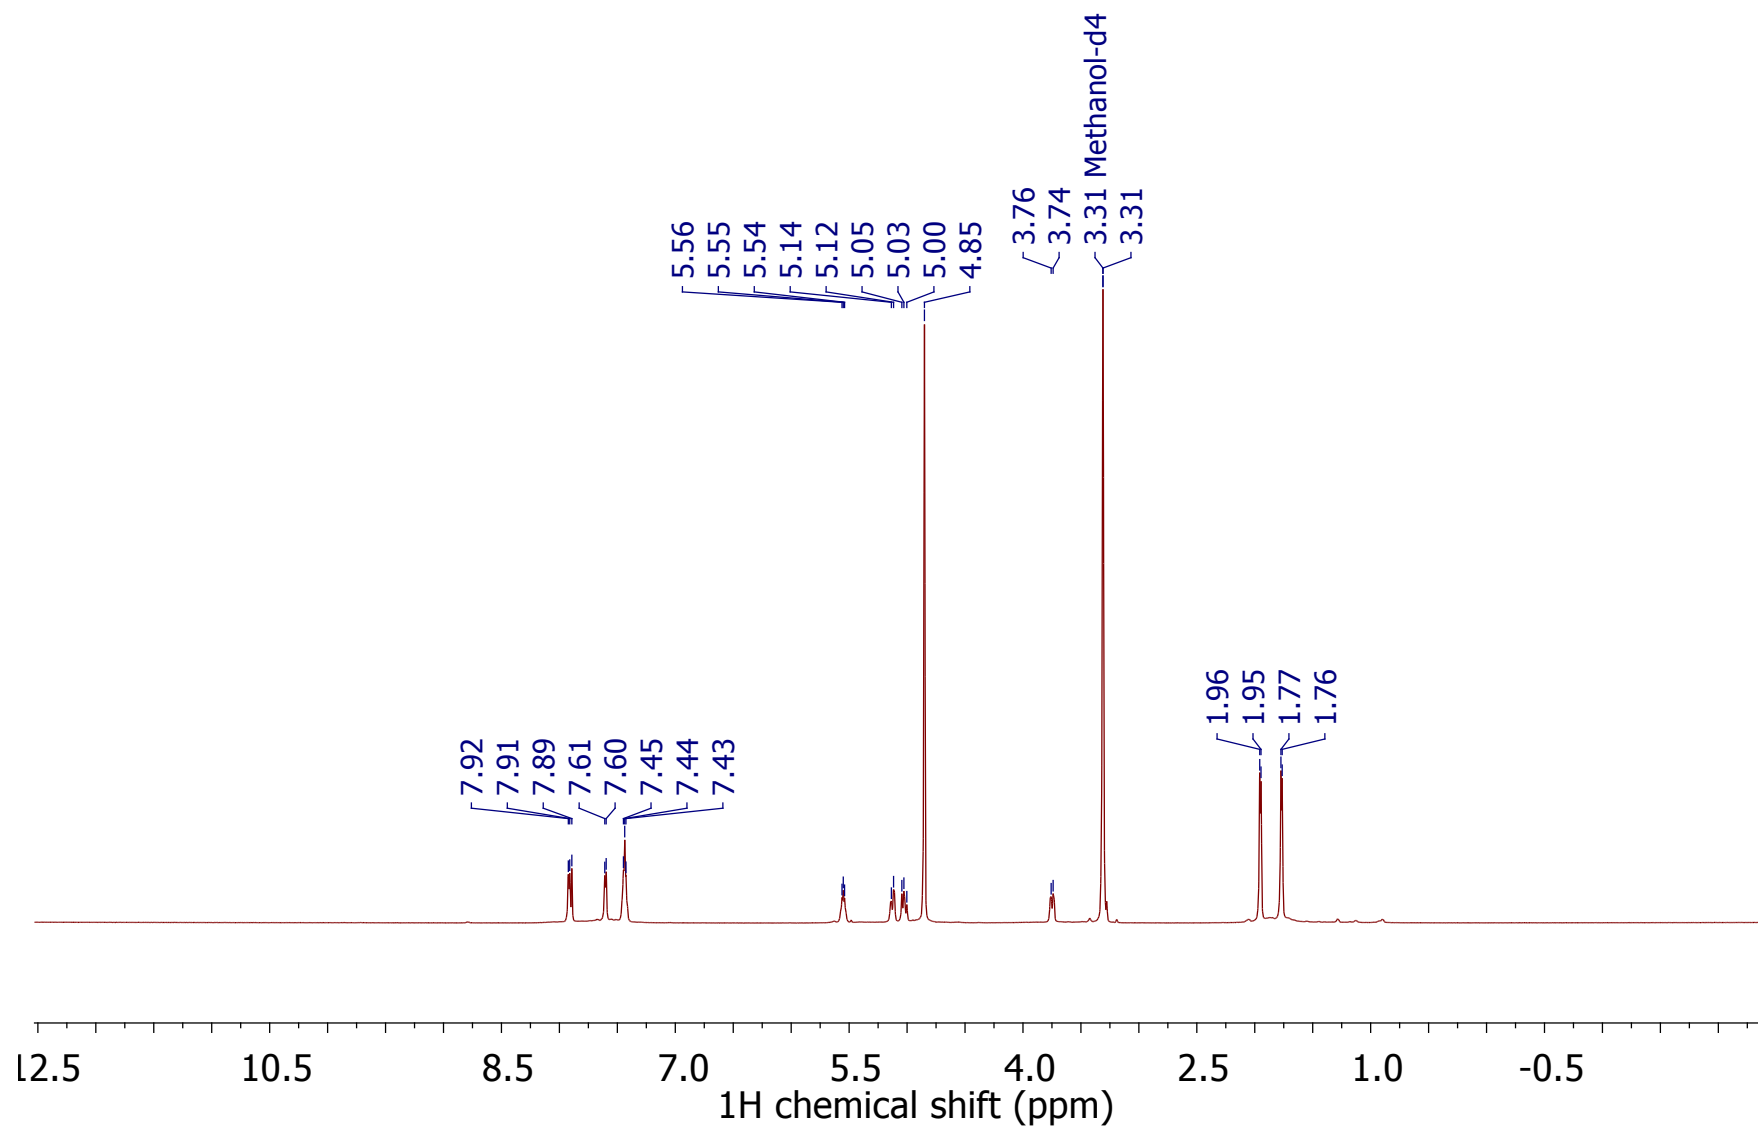

3.1.14 Figure S14:  $^{13}\text{C}\{^1\text{H}\}$  NMR spectrum (101 MHz,  $\text{CDCl}_3$ ) of 5a.

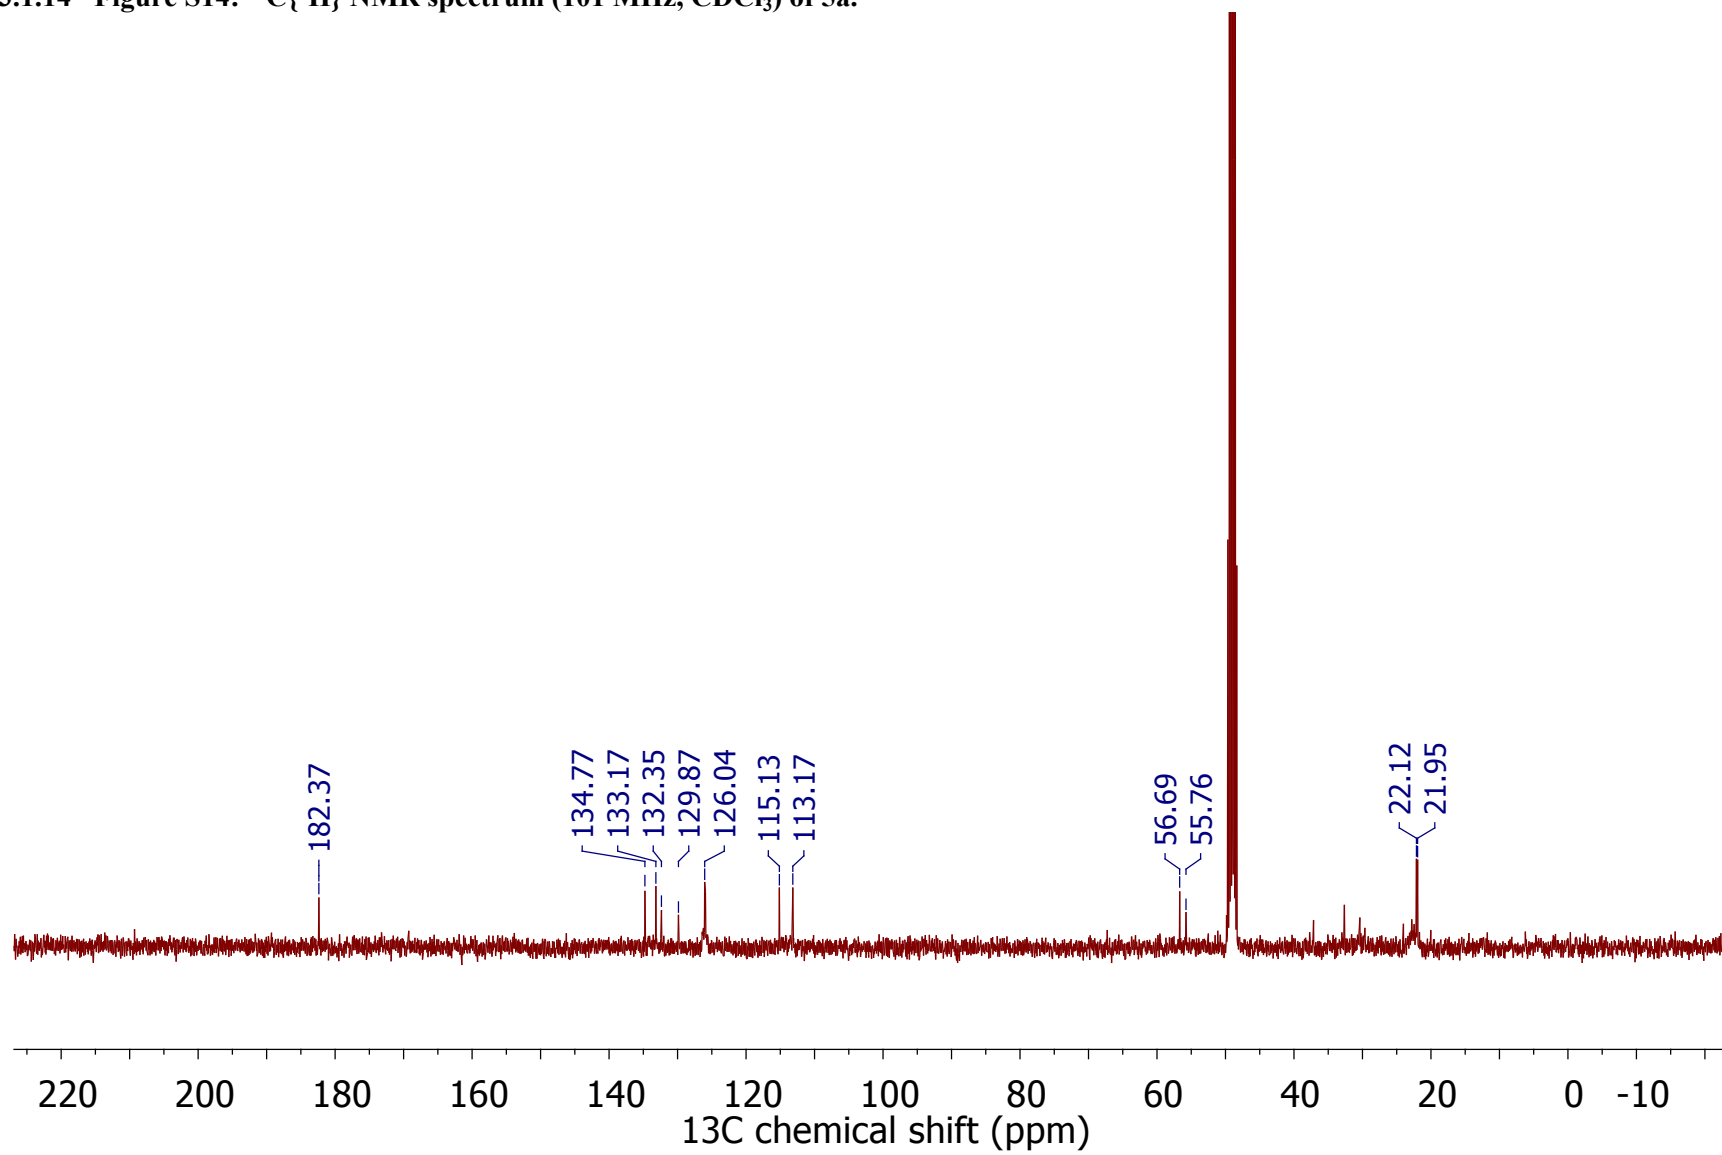

### 3.2 UV-visible Spectroscopy

#### 3.2.1 Figure S15: UV-Vis Spectrum of 5a in MeOH.

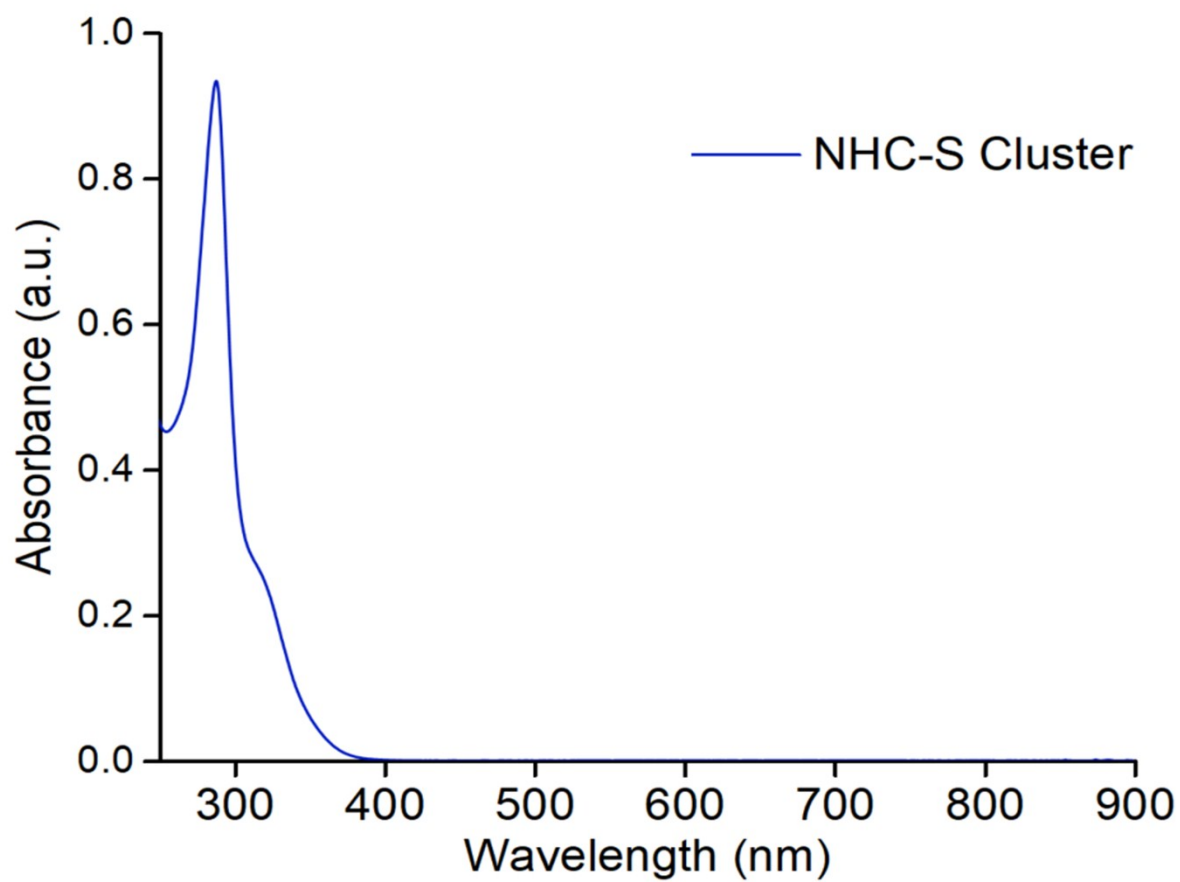

### 3.3 Mass Spectroscopy

#### 3.3.1 Figure S16: ESI-MS of 2a

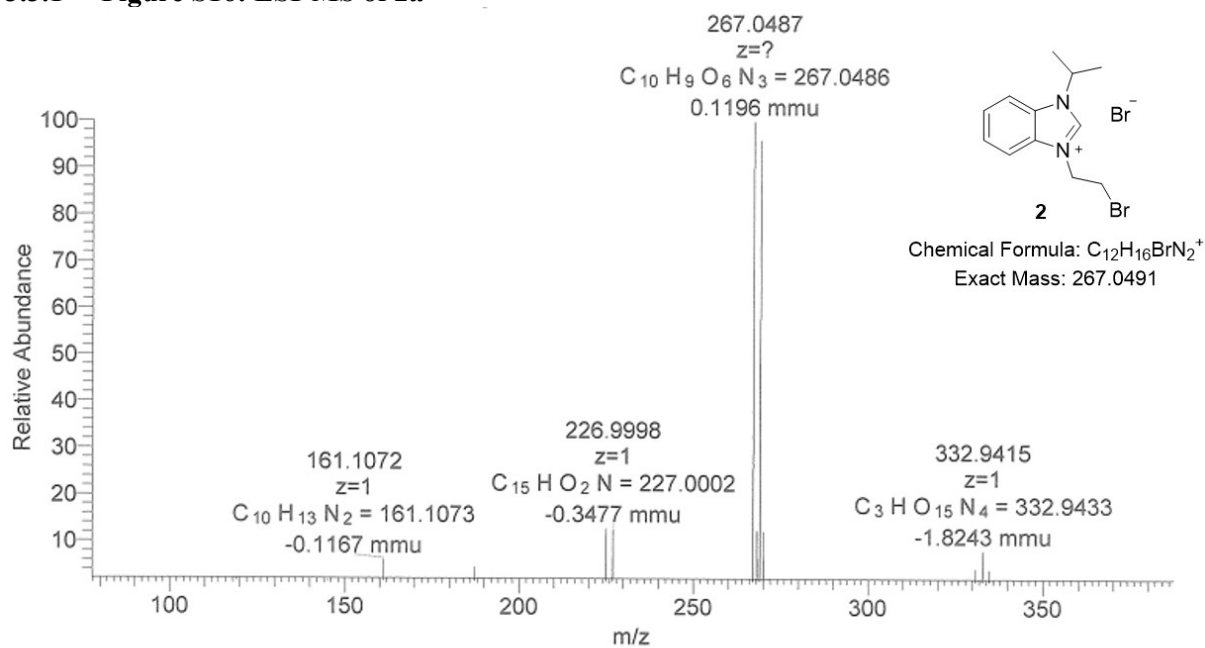

#### 3.3.2 Figure S17: ESI-MS of 2b

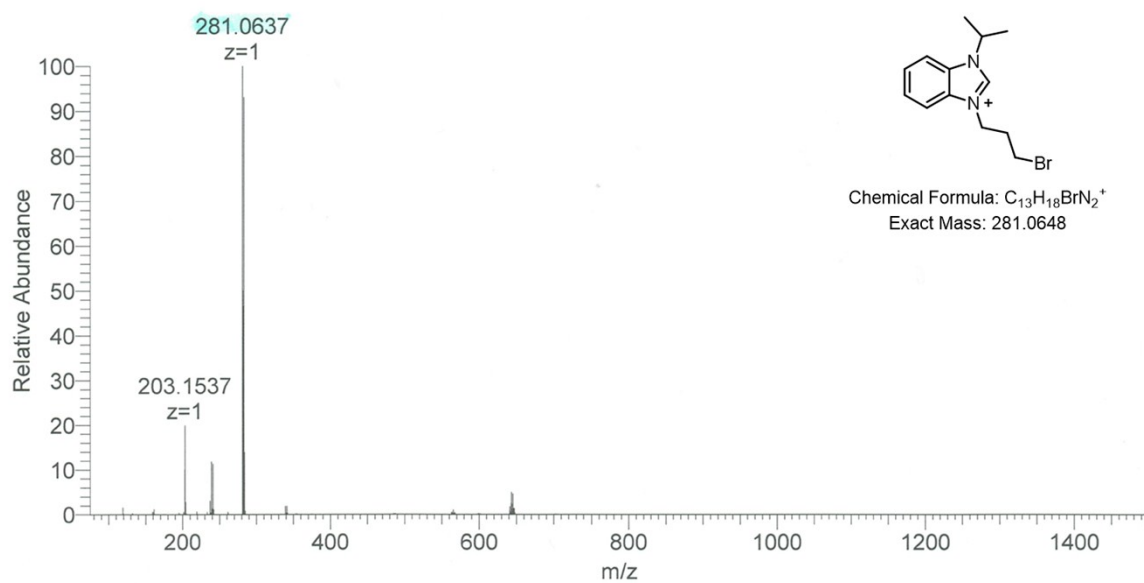

### 3.3.3 Figure S18: ESI-MS of 3a

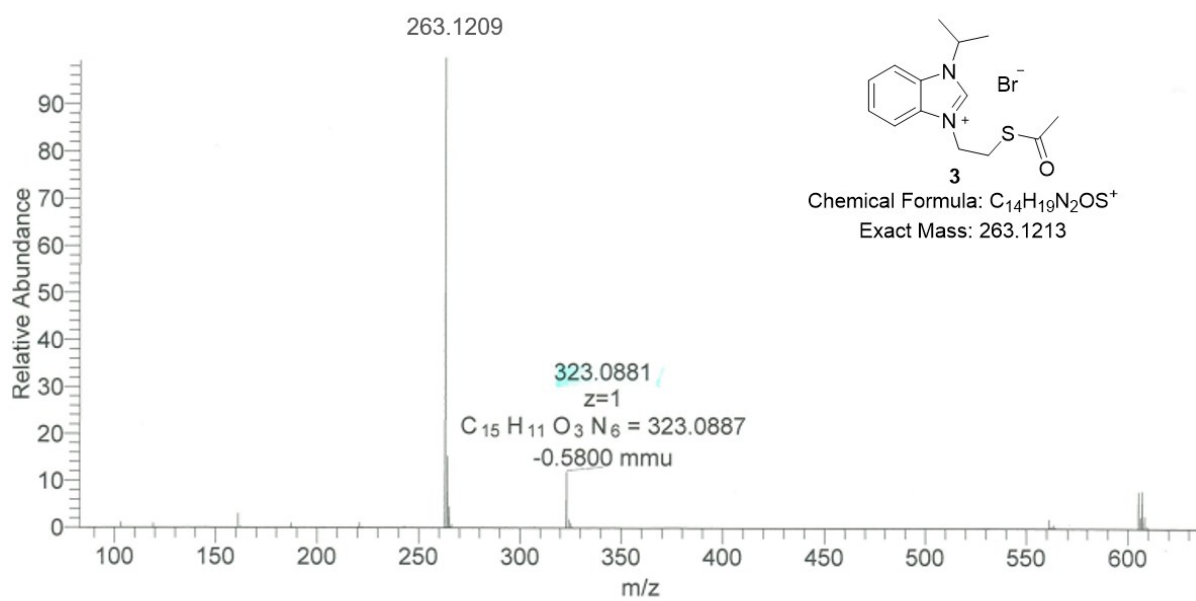

### 3.3.4 Figure S19: ESI-MS of 3b

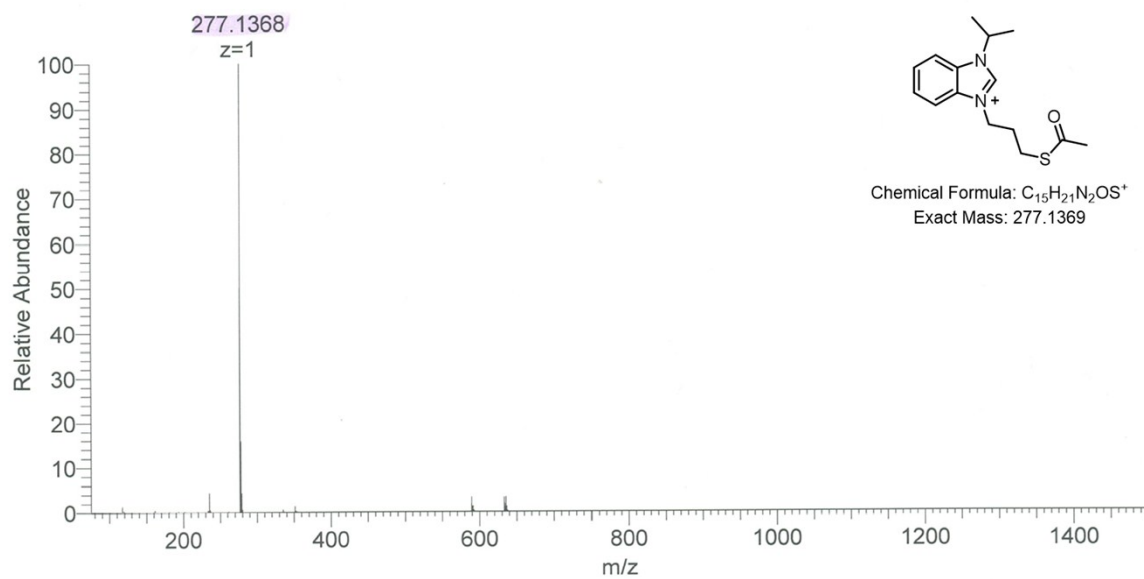



### 3.3.5 Figure S20: ESI-MS of 4a

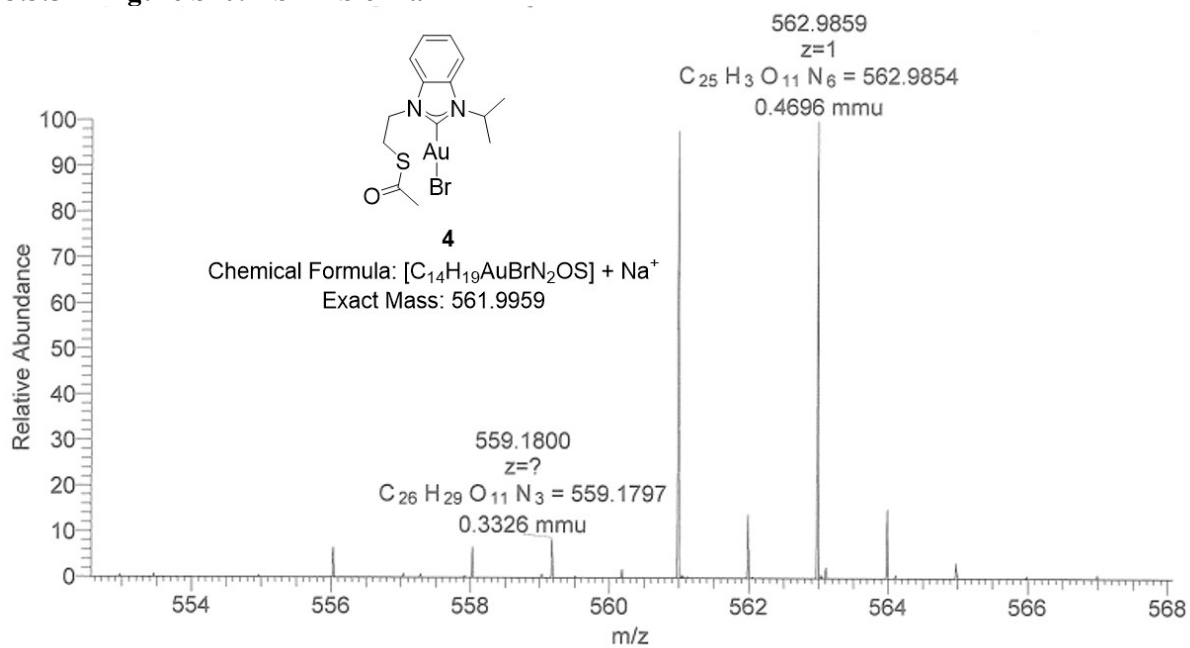

### 3.3.6 Figure S21: ESI-MS of 4b

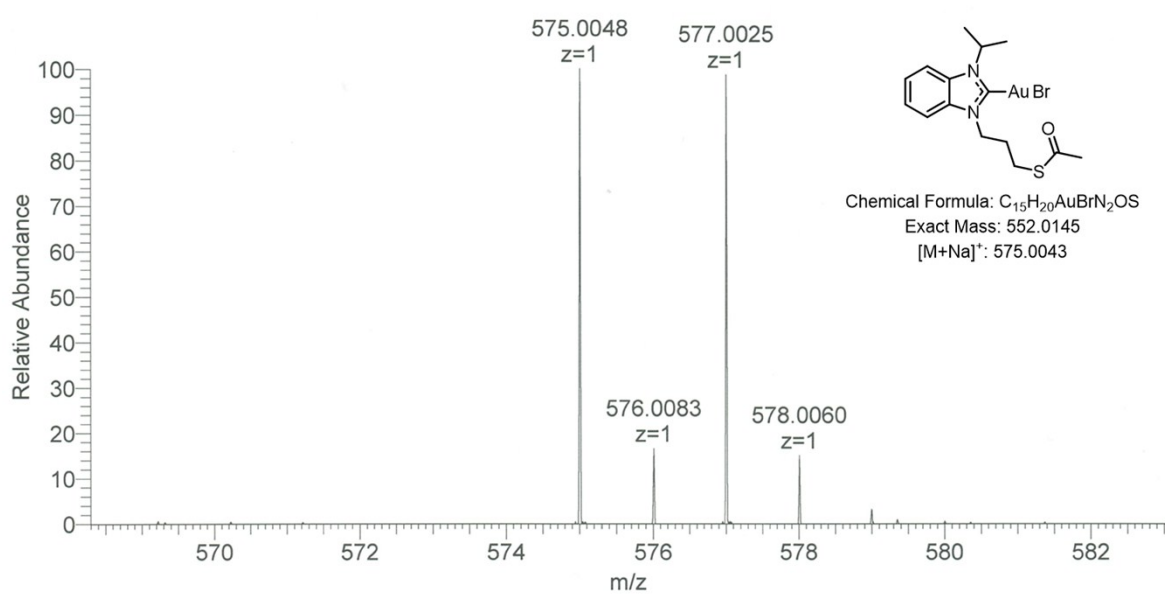

### 3.3.7 Figure S22: ESI-MS of 5a

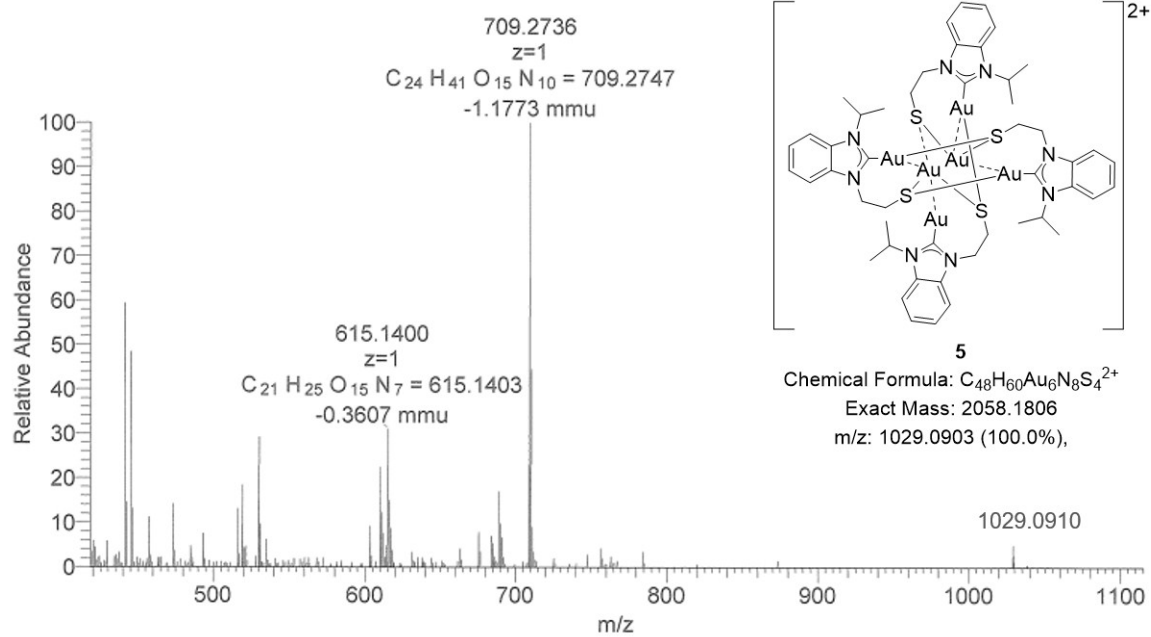

### 3.4 X-ray Crystallography

#### 3.4.1 Table S1: X-ray data for 4a.

|                                   |                                                          |                   |
|-----------------------------------|----------------------------------------------------------|-------------------|
| Identification code               | 4a                                                       |                   |
| Empirical formula                 | C <sub>14</sub> H <sub>18</sub> Au Br N <sub>2</sub> O S |                   |
| Formula weight                    | 539.24                                                   |                   |
| Temperature                       | 180(2) K                                                 |                   |
| Wavelength                        | 0.71073 Å                                                |                   |
| Crystal system                    | Triclinic                                                |                   |
| Space group                       | P-1                                                      |                   |
| Unit cell dimensions              | a = 9.2685(3) Å                                          | α = 66.9380(10)°. |
|                                   | b = 9.2937(3) Å                                          | β = 78.8370(10)°. |
|                                   | c = 10.4915(3) Å                                         | γ = 79.3620(10)°. |
| Volume                            | 809.82(4) Å <sup>3</sup>                                 |                   |
| Z                                 | 2                                                        |                   |
| Density (calculated)              | 2.211 Mg/m <sup>3</sup>                                  |                   |
| Absorption coefficient            | 11.676 mm <sup>-1</sup>                                  |                   |
| F(000)                            | 508                                                      |                   |
| Crystal size                      | 0.151 x 0.122 x 0.102 mm <sup>3</sup>                    |                   |
| Theta range for data collection   | 2.887 to 30.539°.                                        |                   |
| Index ranges                      | -13 ≤ h ≤ 13, -13 ≤ k ≤ 13, -14 ≤ l ≤ 14                 |                   |
| Reflections collected             | 43744                                                    |                   |
| Independent reflections           | 4943 [R(int) = 0.0433]                                   |                   |
| Completeness to theta = 25.242°   | 99.6 %                                                   |                   |
| Absorption correction             | Semi-empirical from equivalents                          |                   |
| Max. and min. transmission        | 0.7461 and 0.4532                                        |                   |
| Refinement method                 | Full-matrix least-squares on F <sup>2</sup>              |                   |
| Data / restraints / parameters    | 4943 / 0 / 184                                           |                   |
| Goodness-of-fit on F <sup>2</sup> | 1.107                                                    |                   |
| Final R indices [I > 2σ(I)]       | R1 = 0.0193, wR2 = 0.0488                                |                   |
| R indices (all data)              | R1 = 0.0215, wR2 = 0.0497                                |                   |
| Extinction coefficient            | n/a                                                      |                   |
| Largest diff. peak and hole       | 0.984 and -1.543 e.Å <sup>-3</sup>                       |                   |

**3.4.2 Table S2: Atomic coordinates ( $\times 10^4$ ) and equivalent isotropic displacement parameters ( $\text{\AA}^2 \times 10^3$ ) for 4a.**

U(eq) is defined as one third of the trace of the orthogonalized  $U^{ij}$  tensor.

|       | x       | y       | z       | U(eq) |
|-------|---------|---------|---------|-------|
| Au(1) | 6389(1) | 3828(1) | 1012(1) | 22(1) |
| Br(1) | 7410(1) | 1945(1) | -63(1)  | 31(1) |
| S(1)  | 1070(1) | 2434(1) | 4096(1) | 30(1) |
| O(1)  | 1116(3) | 3383(3) | 6137(2) | 40(1) |
| N(1)  | 4441(2) | 5114(3) | 3019(2) | 21(1) |
| N(2)  | 6123(2) | 6662(3) | 1831(2) | 22(1) |
| C(1)  | 5615(3) | 5320(3) | 1999(3) | 21(1) |
| C(2)  | 4184(3) | 6333(3) | 3515(3) | 22(1) |
| C(3)  | 3150(3) | 6623(4) | 4562(3) | 27(1) |
| C(4)  | 3198(3) | 7995(4) | 4775(3) | 30(1) |
| C(5)  | 4227(3) | 9033(4) | 3963(3) | 29(1) |
| C(6)  | 5279(3) | 8735(3) | 2935(3) | 26(1) |
| C(7)  | 5242(3) | 7346(3) | 2733(3) | 21(1) |
| C(8)  | 3614(3) | 3758(3) | 3591(3) | 24(1) |
| C(9)  | 2036(3) | 4159(3) | 3229(3) | 26(1) |
| C(10) | 793(3)  | 2363(4) | 5844(3) | 30(1) |
| C(11) | 143(4)  | 921(4)  | 6901(4) | 40(1) |
| C(12) | 7387(3) | 7386(3) | 820(3)  | 26(1) |
| C(13) | 8763(3) | 6214(5) | 867(4)  | 40(1) |
| C(14) | 6923(4) | 8217(5) | -622(3) | 41(1) |

### 3.4.3 Table S3: Bond lengths [Å] and angles [°] for 4a.

---

|              |           |
|--------------|-----------|
| Au(1)-C(1)   | 1.994(3)  |
| Au(1)-Br(1)  | 2.3986(3) |
| S(1)-C(10)   | 1.779(3)  |
| S(1)-C(9)    | 1.809(3)  |
| O(1)-C(10)   | 1.205(4)  |
| N(1)-C(1)    | 1.354(3)  |
| N(1)-C(2)    | 1.387(3)  |
| N(1)-C(8)    | 1.456(3)  |
| N(2)-C(1)    | 1.349(3)  |
| N(2)-C(7)    | 1.396(3)  |
| N(2)-C(12)   | 1.484(3)  |
| C(2)-C(3)    | 1.388(4)  |
| C(2)-C(7)    | 1.395(4)  |
| C(3)-C(4)    | 1.388(4)  |
| C(3)-H(3)    | 0.9500    |
| C(4)-C(5)    | 1.396(4)  |
| C(4)-H(4)    | 0.9500    |
| C(5)-C(6)    | 1.385(4)  |
| C(5)-H(5)    | 0.9500    |
| C(6)-C(7)    | 1.395(4)  |
| C(6)-H(6)    | 0.9500    |
| C(8)-C(9)    | 1.524(4)  |
| C(8)-H(8A)   | 0.9900    |
| C(8)-H(8B)   | 0.9900    |
| C(9)-H(9A)   | 0.9900    |
| C(9)-H(9B)   | 0.9900    |
| C(10)-C(11)  | 1.505(4)  |
| C(11)-H(11A) | 0.9800    |
| C(11)-H(11B) | 0.9800    |
| C(11)-H(11C) | 0.9800    |
| C(12)-C(13)  | 1.511(4)  |
| C(12)-C(14)  | 1.512(4)  |
| C(12)-H(12)  | 1.0000    |
| C(13)-H(13A) | 0.9800    |
| C(13)-H(13B) | 0.9800    |
| C(13)-H(13C) | 0.9800    |
| C(14)-H(14A) | 0.9800    |

|                  |            |
|------------------|------------|
| C(14)-H(14B)     | 0.9800     |
| C(14)-H(14C)     | 0.9800     |
| C(1)-Au(1)-Br(1) | 176.54(7)  |
| C(10)-S(1)-C(9)  | 99.89(14)  |
| C(1)-N(1)-C(2)   | 110.5(2)   |
| C(1)-N(1)-C(8)   | 125.3(2)   |
| C(2)-N(1)-C(8)   | 124.1(2)   |
| C(1)-N(2)-C(7)   | 109.9(2)   |
| C(1)-N(2)-C(12)  | 127.0(2)   |
| C(7)-N(2)-C(12)  | 123.1(2)   |
| N(2)-C(1)-N(1)   | 107.0(2)   |
| N(2)-C(1)-Au(1)  | 128.99(19) |
| N(1)-C(1)-Au(1)  | 123.96(19) |
| N(1)-C(2)-C(3)   | 132.0(3)   |
| N(1)-C(2)-C(7)   | 106.0(2)   |
| C(3)-C(2)-C(7)   | 122.0(2)   |
| C(4)-C(3)-C(2)   | 116.6(3)   |
| C(4)-C(3)-H(3)   | 121.7      |
| C(2)-C(3)-H(3)   | 121.7      |
| C(3)-C(4)-C(5)   | 121.4(3)   |
| C(3)-C(4)-H(4)   | 119.3      |
| C(5)-C(4)-H(4)   | 119.3      |
| C(6)-C(5)-C(4)   | 122.3(3)   |
| C(6)-C(5)-H(5)   | 118.9      |
| C(4)-C(5)-H(5)   | 118.9      |
| C(5)-C(6)-C(7)   | 116.3(3)   |
| C(5)-C(6)-H(6)   | 121.8      |
| C(7)-C(6)-H(6)   | 121.8      |
| C(2)-C(7)-C(6)   | 121.4(2)   |
| C(2)-C(7)-N(2)   | 106.4(2)   |
| C(6)-C(7)-N(2)   | 132.1(3)   |
| N(1)-C(8)-C(9)   | 113.1(2)   |
| N(1)-C(8)-H(8A)  | 109.0      |
| C(9)-C(8)-H(8A)  | 109.0      |
| N(1)-C(8)-H(8B)  | 109.0      |
| C(9)-C(8)-H(8B)  | 109.0      |
| H(8A)-C(8)-H(8B) | 107.8      |

|                     |            |
|---------------------|------------|
| C(8)-C(9)-S(1)      | 109.45(19) |
| C(8)-C(9)-H(9A)     | 109.8      |
| S(1)-C(9)-H(9A)     | 109.8      |
| C(8)-C(9)-H(9B)     | 109.8      |
| S(1)-C(9)-H(9B)     | 109.8      |
| H(9A)-C(9)-H(9B)    | 108.2      |
| O(1)-C(10)-C(11)    | 123.9(3)   |
| O(1)-C(10)-S(1)     | 122.1(2)   |
| C(11)-C(10)-S(1)    | 114.0(2)   |
| C(10)-C(11)-H(11A)  | 109.5      |
| C(10)-C(11)-H(11B)  | 109.5      |
| H(11A)-C(11)-H(11B) | 109.5      |
| C(10)-C(11)-H(11C)  | 109.5      |
| H(11A)-C(11)-H(11C) | 109.5      |
| H(11B)-C(11)-H(11C) | 109.5      |
| N(2)-C(12)-C(13)    | 112.2(2)   |
| N(2)-C(12)-C(14)    | 109.8(2)   |
| C(13)-C(12)-C(14)   | 113.6(3)   |
| N(2)-C(12)-H(12)    | 107.0      |
| C(13)-C(12)-H(12)   | 107.0      |
| C(14)-C(12)-H(12)   | 107.0      |
| C(12)-C(13)-H(13A)  | 109.5      |
| C(12)-C(13)-H(13B)  | 109.5      |
| H(13A)-C(13)-H(13B) | 109.5      |
| C(12)-C(13)-H(13C)  | 109.5      |
| H(13A)-C(13)-H(13C) | 109.5      |
| H(13B)-C(13)-H(13C) | 109.5      |
| C(12)-C(14)-H(14A)  | 109.5      |
| C(12)-C(14)-H(14B)  | 109.5      |
| H(14A)-C(14)-H(14B) | 109.5      |
| C(12)-C(14)-H(14C)  | 109.5      |
| H(14A)-C(14)-H(14C) | 109.5      |
| H(14B)-C(14)-H(14C) | 109.5      |

---

Symmetry transformations used to generate equivalent atoms:

### 3.4.4 Table S4: Anisotropic displacement parameters ( $\text{\AA}^2 \times 10^3$ ) for 4a.

The anisotropic displacement factor exponent takes the form:  $-2\pi^2 [ h^2 a^{*2} U^{11} + \dots + 2 h k a^* b^* U^{12} ]$

|       | U <sup>11</sup> | U <sup>22</sup> | U <sup>33</sup> | U <sup>23</sup> | U <sup>13</sup> | U <sup>12</sup> |
|-------|-----------------|-----------------|-----------------|-----------------|-----------------|-----------------|
| Au(1) | 21(1)           | 22(1)           | 23(1)           | -10(1)          | 1(1)            | -4(1)           |
| Br(1) | 33(1)           | 28(1)           | 34(1)           | -16(1)          | 4(1)            | -5(1)           |
| S(1)  | 29(1)           | 33(1)           | 32(1)           | -14(1)          | 3(1)            | -12(1)          |
| O(1)  | 42(1)           | 45(1)           | 38(1)           | -23(1)          | 7(1)            | -14(1)          |
| N(1)  | 20(1)           | 20(1)           | 22(1)           | -8(1)           | -1(1)           | -1(1)           |
| N(2)  | 20(1)           | 23(1)           | 22(1)           | -9(1)           | -1(1)           | -2(1)           |
| C(1)  | 21(1)           | 20(1)           | 20(1)           | -6(1)           | -3(1)           | -2(1)           |
| C(2)  | 22(1)           | 21(1)           | 22(1)           | -8(1)           | -5(1)           | 2(1)            |
| C(3)  | 22(1)           | 31(1)           | 27(1)           | -13(1)          | 0(1)            | 1(1)            |
| C(4)  | 30(1)           | 33(2)           | 29(1)           | -18(1)          | -3(1)           | 5(1)            |
| C(5)  | 31(1)           | 26(1)           | 34(1)           | -16(1)          | -8(1)           | 4(1)            |
| C(6)  | 28(1)           | 22(1)           | 28(1)           | -9(1)           | -7(1)           | -1(1)           |
| C(7)  | 22(1)           | 22(1)           | 20(1)           | -8(1)           | -4(1)           | 1(1)            |
| C(8)  | 21(1)           | 21(1)           | 27(1)           | -6(1)           | 0(1)            | -2(1)           |
| C(9)  | 23(1)           | 25(1)           | 27(1)           | -7(1)           | -1(1)           | -5(1)           |
| C(10) | 23(1)           | 32(1)           | 30(1)           | -10(1)          | 2(1)            | -3(1)           |
| C(11) | 38(2)           | 38(2)           | 36(2)           | -5(1)           | 2(1)            | -11(1)          |
| C(12) | 24(1)           | 31(1)           | 28(1)           | -14(1)          | 4(1)            | -11(1)          |
| C(13) | 21(1)           | 51(2)           | 56(2)           | -30(2)          | 4(1)            | -8(1)           |
| C(14) | 42(2)           | 50(2)           | 29(2)           | -7(1)           | 2(1)            | -19(2)          |



**3.4.5 Table S5: Anisotropic Hydrogen coordinates ( $\times 10^4$ ) and isotropic displacement parameters ( $\text{\AA}^2 \times 10^3$ ) for 4a.**

|        | x    | y    | z     | U(eq) |
|--------|------|------|-------|-------|
| H(3)   | 2445 | 5918 | 5106  | 32    |
| H(4)   | 2517 | 8232 | 5489  | 36    |
| H(5)   | 4205 | 9977 | 4121  | 35    |
| H(6)   | 5988 | 9438 | 2396  | 31    |
| H(8A)  | 3578 | 3312 | 4621  | 29    |
| H(8B)  | 4145 | 2940 | 3229  | 29    |
| H(9A)  | 2058 | 4517 | 2205  | 31    |
| H(9B)  | 1512 | 5023 | 3534  | 31    |
| H(11A) | -308 | 434  | 6423  | 60    |
| H(11B) | -614 | 1221 | 7575  | 60    |
| H(11C) | 928  | 167  | 7394  | 60    |
| H(12)  | 7625 | 8212 | 1108  | 32    |
| H(13A) | 8644 | 5501 | 421   | 60    |
| H(13B) | 8916 | 5603 | 1842  | 60    |
| H(13C) | 9622 | 6778 | 369   | 60    |
| H(14A) | 7731 | 8773 | -1268 | 62    |
| H(14B) | 6043 | 8976 | -585  | 62    |
| H(14C) | 6692 | 7442 | -948  | 62    |

**3.4.6 Table S6: X-ray data for 5a**

|                                   |                                                                                                                             |
|-----------------------------------|-----------------------------------------------------------------------------------------------------------------------------|
| Identification code               | <b>5a</b>                                                                                                                   |
| Empirical formula                 | C <sub>50</sub> H <sub>60</sub> Au <sub>6</sub> F <sub>12</sub> N <sub>8</sub> O <sub>2</sub> P <sub>2</sub> S <sub>4</sub> |
| Formula weight                    | 2405.04                                                                                                                     |
| Temperature                       | 123(2) K                                                                                                                    |
| Wavelength                        | 0.71075 Å                                                                                                                   |
| Crystal system                    | Orthorhombic                                                                                                                |
| Space group                       | F d d d :2                                                                                                                  |
| Unit cell dimensions              | a = 12.360(4) Å $\alpha = 90^\circ$ .<br>b = 29.522(9) Å $\beta = 90^\circ$ .<br>c = 35.0152(10) Å $\gamma = 90^\circ$ .    |
| Volume                            | 12777(6) Å <sup>3</sup>                                                                                                     |
| Z                                 | 8                                                                                                                           |
| Density (calculated)              | 2.501 Mg/m <sup>3</sup>                                                                                                     |
| Absorption coefficient            | 13.988 mm <sup>-1</sup>                                                                                                     |
| F(000)                            | 8864                                                                                                                        |
| Crystal size                      | 0.150 x 0.150 x 0.150 mm <sup>3</sup>                                                                                       |
| Theta range for data collection   | 3.170 to 24.997°.                                                                                                           |
| Index ranges                      | -14 ≤ h ≤ 14, -35 ≤ k ≤ 35, -41 ≤ l ≤ 41                                                                                    |
| Reflections collected             | 37240                                                                                                                       |
| Independent reflections           | 2815 [R(int) = 0.0662]                                                                                                      |
| Completeness to theta = 24.997°   | 99.8 %                                                                                                                      |
| Absorption correction             | Semi-empirical from equivalents                                                                                             |
| Max. and min. transmission        | 1.000 and 0.446                                                                                                             |
| Refinement method                 | Full-matrix least-squares on F <sup>2</sup>                                                                                 |
| Data / restraints / parameters    | 2815 / 83 / 238                                                                                                             |
| Goodness-of-fit on F <sup>2</sup> | 0.992                                                                                                                       |
| Final R indices [I > 2σ(I)]       | R1 = 0.0178, wR2 = 0.0413                                                                                                   |
| R indices (all data)              | R1 = 0.0227, wR2 = 0.0420                                                                                                   |
| Extinction coefficient            | n/a                                                                                                                         |
| Largest diff. peak and hole       | 0.907 and -1.005 e.Å <sup>-3</sup>                                                                                          |

**3.4.7 Table S7: Atomic coordinates ( $\times 10^4$ ) and equivalent isotropic displacement parameters ( $\text{\AA}^2 \times 10^3$ ) for a. U(eq) is defined as one third of the trace of the orthogonalized  $U^{ij}$  tensor.**

|       | x        | y       | z       | U(eq)  |
|-------|----------|---------|---------|--------|
| Au(1) | 6183(1)  | 1859(1) | 714(1)  | 16(1)  |
| Au(2) | 8124(1)  | 1250    | 1250    | 17(1)  |
| S(1)  | 8164(1)  | 1785(1) | 1721(1) | 19(1)  |
| C(1)  | 7760(3)  | 1966(1) | 607(1)  | 14(1)  |
| N(1)  | 8412(2)  | 2243(1) | 810(1)  | 15(1)  |
| C(2)  | 9415(3)  | 2281(1) | 633(1)  | 19(1)  |
| C(3)  | 9366(3)  | 2010(1) | 304(1)  | 18(1)  |
| N(2)  | 8327(2)  | 1819(1) | 302(1)  | 15(1)  |
| C(4)  | 8112(3)  | 2490(1) | 1154(1) | 18(1)  |
| C(5)  | 8656(3)  | 2318(1) | 1515(1) | 18(1)  |
| C(6)  | 10319(3) | 2542(1) | 724(1)  | 23(1)  |
| C(7)  | 11179(3) | 2510(2) | 477(1)  | 32(1)  |
| C(8)  | 11143(3) | 2235(2) | 151(1)  | 33(1)  |
| C(9)  | 10245(3) | 1984(1) | 56(1)   | 27(1)  |
| C(10) | 7818(3)  | 1547(1) | -5(1)   | 22(1)  |
| C(11) | 7404(4)  | 1858(2) | -316(1) | 39(1)  |
| C(12) | 8563(4)  | 1181(2) | -162(1) | 33(1)  |
| P(1)  | 8750     | 3750    | 1548(1) | 22(1)  |
| F(1)  | 8750     | 3750    | 1097(2) | 35(3)  |
| F(2)  | 8750     | 3750    | 2008(2) | 44(3)  |
| F(3)  | 9550(5)  | 3322(2) | 1557(2) | 44(3)  |
| F(4)  | 7723(2)  | 3420(1) | 1550(1) | 32(1)  |
| F(5)  | 9465(7)  | 3369(3) | 1339(3) | 30(4)  |
| F(6)  | 9147(7)  | 3544(3) | 1952(2) | 33(4)  |
| F(7)  | 8421(9)  | 3949(3) | 1142(2) | 31(4)  |
| F(8)  | 8095(10) | 4131(3) | 1764(3) | 37(4)  |
| C(13) | 1250     | 1250    | 1250    | 143(6) |
| O(1)  | 1250     | 1250    | 869(2)  | 193(5) |
| C(14) | 1110(30) | 1705(7) | 1449(9) | 115(7) |

**3.4.8 Table S8: Bond lengths [Å] and angles [°] for 5a.**

---

|                    |            |
|--------------------|------------|
| Au(1)-C(1)         | 2.010(4)   |
| Au(1)-S(1)#1       | 2.3036(12) |
| Au(2)-S(1)         | 2.2855(11) |
| Au(2)-S(1)#2       | 2.2855(11) |
| S(1)-C(5)          | 1.835(4)   |
| S(1)-Au(1)#1       | 2.3036(12) |
| C(1)-N(1)          | 1.348(5)   |
| C(1)-N(2)          | 1.349(5)   |
| N(1)-C(2)          | 1.391(5)   |
| N(1)-C(4)          | 1.458(5)   |
| C(2)-C(6)          | 1.395(5)   |
| C(2)-C(3)          | 1.403(6)   |
| C(3)-C(9)          | 1.393(5)   |
| C(3)-N(2)          | 1.401(5)   |
| N(2)-C(10)         | 1.484(5)   |
| C(4)-C(5)          | 1.518(5)   |
| C(4)-H(1)          | 0.9900     |
| C(4)-H(2)          | 0.9900     |
| C(5)-H(3)          | 0.9900     |
| C(5)-H(4)          | 0.9900     |
| C(6)-C(7)          | 1.373(6)   |
| C(6)-H(5)          | 0.9500     |
| C(7)-C(8)          | 1.400(7)   |
| C(7)-H(6)          | 0.9500     |
| C(8)-C(9)          | 1.377(6)   |
| C(8)-H(7)          | 0.9500     |
| C(9)-H(8)          | 0.9500     |
| C(10)-C(11)        | 1.514(6)   |
| C(10)-C(12)        | 1.522(6)   |
| C(10)-H(9)         | 1.0000     |
| C(11)-H(10)        | 0.9800     |
| C(11)-H(11)        | 0.9800     |
| C(11)-H(12)        | 0.9800     |
| C(12)-H(13)        | 0.9800     |
| C(12)-H(14)        | 0.9800     |
| C(12)-H(15)        | 0.9800     |
| C(1)-Au(1)-S(1)#1  | 173.66(11) |
| S(1)-Au(2)-S(1)#2  | 177.55(5)  |
| C(5)-S(1)-Au(2)    | 108.38(13) |
| C(5)-S(1)-Au(1)#1  | 106.66(12) |
| Au(2)-S(1)-Au(1)#1 | 96.60(4)   |
| N(1)-C(1)-N(2)     | 107.5(3)   |
| N(1)-C(1)-Au(1)    | 125.2(3)   |
| N(2)-C(1)-Au(1)    | 126.9(3)   |
| C(1)-N(1)-C(2)     | 110.3(3)   |
| C(1)-N(1)-C(4)     | 125.9(3)   |
| C(2)-N(1)-C(4)     | 123.7(3)   |
| N(1)-C(2)-C(6)     | 131.1(4)   |
| N(1)-C(2)-C(3)     | 106.3(3)   |
| C(6)-C(2)-C(3)     | 122.5(4)   |
| C(9)-C(3)-N(2)     | 133.6(4)   |
| C(9)-C(3)-C(2)     | 120.6(4)   |
| N(2)-C(3)-C(2)     | 105.8(3)   |

|                   |          |
|-------------------|----------|
| C(1)-N(2)-C(3)    | 110.1(3) |
| C(1)-N(2)-C(10)   | 121.9(3) |
| C(3)-N(2)-C(10)   | 127.5(3) |
| N(1)-C(4)-C(5)    | 114.1(3) |
| N(1)-C(4)-H(1)    | 108.7    |
| C(5)-C(4)-H(1)    | 108.7    |
| N(1)-C(4)-H(2)    | 108.7    |
| C(5)-C(4)-H(2)    | 108.7    |
| H(1)-C(4)-H(2)    | 107.6    |
| C(4)-C(5)-S(1)    | 117.8(3) |
| C(4)-C(5)-H(3)    | 107.8    |
| S(1)-C(5)-H(3)    | 107.8    |
| C(4)-C(5)-H(4)    | 107.8    |
| S(1)-C(5)-H(4)    | 107.8    |
| H(3)-C(5)-H(4)    | 107.2    |
| C(7)-C(6)-C(2)    | 116.0(4) |
| C(7)-C(6)-H(5)    | 122.0    |
| C(2)-C(6)-H(5)    | 122.0    |
| C(6)-C(7)-C(8)    | 121.9(4) |
| C(6)-C(7)-H(6)    | 119.0    |
| C(8)-C(7)-H(6)    | 119.0    |
| C(9)-C(8)-C(7)    | 122.3(4) |
| C(9)-C(8)-H(7)    | 118.8    |
| C(7)-C(8)-H(7)    | 118.8    |
| C(8)-C(9)-C(3)    | 116.6(4) |
| C(8)-C(9)-H(8)    | 121.7    |
| C(3)-C(9)-H(8)    | 121.7    |
| N(2)-C(10)-C(11)  | 109.7(3) |
| N(2)-C(10)-C(12)  | 113.0(3) |
| C(11)-C(10)-C(12) | 112.1(4) |
| N(2)-C(10)-H(9)   | 107.3    |
| C(11)-C(10)-H(9)  | 107.3    |
| C(12)-C(10)-H(9)  | 107.3    |
| C(10)-C(11)-H(10) | 109.5    |
| C(10)-C(11)-H(11) | 109.5    |
| H(10)-C(11)-H(11) | 109.5    |
| C(10)-C(11)-H(12) | 109.5    |
| H(10)-C(11)-H(12) | 109.5    |
| H(11)-C(11)-H(12) | 109.5    |
| C(10)-C(12)-H(13) | 109.5    |
| C(10)-C(12)-H(14) | 109.5    |
| H(13)-C(12)-H(14) | 109.5    |
| C(10)-C(12)-H(15) | 109.5    |
| H(13)-C(12)-H(15) | 109.5    |
| H(14)-C(12)-H(15) | 109.5    |

---

Symmetry transformations used to generate equivalent atoms:

#1  $-x+5/4, y, -z+1/4$  #2  $x, -y+1/4, -z+1/4$  #3  $-x+7/4, -y+3/4, z$

### 3.4.9 Table S9: Anisotropic displacement parameters

Anisotropic displacement parameters ( $\text{\AA}^2 \times 10^3$ ) for a. The anisotropic displacement factor exponent takes the form:  $-2\pi^2[\eta^2 \alpha^* 2Y^{11} + \dots + 2\eta \kappa \alpha^* \beta^* Y^{12}]$

|       | U11    | U22     | U33     | U23    | U13    | U12    |
|-------|--------|---------|---------|--------|--------|--------|
| Au(1) | 16(1)  | 15(1)   | 16(1)   | -2(1)  | 2(1)   | -2(1)  |
| Au(2) | 14(1)  | 14(1)   | 24(1)   | 4(1)   | 0      | 0      |
| S(1)  | 18(1)  | 20(1)   | 19(1)   | 5(1)   | 0(1)   | 2(1)   |
| C(1)  | 22(2)  | 8(2)    | 12(2)   | 4(2)   | 3(2)   | 1(2)   |
| N(1)  | 16(2)  | 16(2)   | 13(2)   | 0(1)   | 3(1)   | -1(1)  |
| C(2)  | 19(2)  | 19(2)   | 17(2)   | 5(2)   | 1(2)   | 1(2)   |
| C(3)  | 18(2)  | 15(2)   | 20(2)   | 4(2)   | 4(2)   | 0(2)   |
| N(2)  | 21(2)  | 11(2)   | 14(2)   | -1(1)  | 2(1)   | 2(1)   |
| C(4)  | 25(2)  | 11(2)   | 17(2)   | -2(2)  | 0(2)   | -1(2)  |
| C(5)  | 16(2)  | 20(2)   | 17(2)   | -3(2)  | 0(2)   | -5(2)  |
| C(6)  | 22(2)  | 20(2)   | 27(3)   | 8(2)   | 0(2)   | -6(2)  |
| C(7)  | 20(2)  | 32(3)   | 42(3)   | 9(2)   | -2(2)  | -9(2)  |
| C(8)  | 21(2)  | 40(3)   | 38(3)   | 6(2)   | 13(2)  | 0(2)   |
| C(9)  | 25(2)  | 28(3)   | 29(3)   | 0(2)   | 8(2)   | 1(2)   |
| C(10) | 32(2)  | 18(2)   | 17(2)   | -7(2)  | 3(2)   | -3(2)  |
| C(11) | 59(3)  | 34(3)   | 24(3)   | -4(2)  | -19(2) | 5(3)   |
| C(12) | 46(3)  | 22(2)   | 30(3)   | -7(2)  | 13(2)  | 0(2)   |
| P(1)  | 30(1)  | 16(1)   | 21(1)   | 0      | 0      | -7(1)  |
| F(1)  | 30(5)  | 57(7)   | 18(4)   | 0      | 0      | -1(5)  |
| F(2)  | 60(7)  | 50(7)   | 22(4)   | 0      | 0      | -24(5) |
| F(3)  | 39(4)  | 20(4)   | 74(8)   | 8(5)   | -25(6) | 0(3)   |
| F(4)  | 34(1)  | 23(1)   | 38(2)   | -6(1)  | 4(1)   | -12(1) |
| F(5)  | 22(7)  | 15(7)   | 54(12)  | -12(8) | 12(7)  | -3(5)  |
| F(6)  | 35(7)  | 32(7)   | 31(6)   | 19(5)  | 3(5)   | -3(6)  |
| F(7)  | 36(8)  | 34(8)   | 24(6)   | -3(5)  | -5(5)  | -4(6)  |
| F(8)  | 44(7)  | 26(7)   | 40(8)   | -16(6) | 4(7)   | 4(5)   |
| C(13) | 115(7) | 163(8)  | 150(8)  | 0      | 0      | 0      |
| O(1)  | 156(7) | 224(8)  | 200(8)  | 0      | 0      | 14(6)  |
| C(14) | 103(9) | 118(10) | 125(10) | 3(7)   | -8(7)  | -3(7)  |

### 3.4.10 Table S10: Hydrogen coordinates

Hydrogen coordinates ( $\times 10^4$ ) and isotropic displacement parameters ( $\text{\AA}^2 \times 10^3$ )

|       | x     | y    | z    | U(eq) |
|-------|-------|------|------|-------|
| H(1)  | 7318  | 2470 | 1188 | 21    |
| H(2)  | 8300  | 2813 | 1119 | 21    |
| H(3)  | 8589  | 2556 | 1712 | 21    |
| H(4)  | 9437  | 2282 | 1460 | 21    |
| H(5)  | 10339 | 2731 | 943  | 28    |
| H(6)  | 11817 | 2678 | 529  | 38    |
| H(7)  | 11760 | 2223 | -10  | 40    |
| H(8)  | 10226 | 1801 | -167 | 33    |
| H(9)  | 7176  | 1391 | 108  | 27    |
| H(10) | 6884  | 2073 | -207 | 59    |
| H(11) | 7049  | 1678 | -515 | 59    |
| H(12) | 8012  | 2025 | -428 | 59    |
| H(13) | 9105  | 1319 | -330 | 49    |
| H(14) | 8136  | 961  | -307 | 49    |
| H(15) | 8927  | 1027 | 50   | 49    |

### 3.4.11 Table S11: Torsion angles [°] for 5a.

---

|                        |           |
|------------------------|-----------|
| N(2)-C(1)-N(1)-C(2)    | 0.6(4)    |
| Au(1)-C(1)-N(1)-C(2)   | -172.9(3) |
| N(2)-C(1)-N(1)-C(4)    | 177.5(3)  |
| Au(1)-C(1)-N(1)-C(4)   | 4.0(5)    |
| C(1)-N(1)-C(2)-C(6)    | 176.4(4)  |
| C(4)-N(1)-C(2)-C(6)    | -0.6(6)   |
| C(1)-N(1)-C(2)-C(3)    | -0.1(4)   |
| C(4)-N(1)-C(2)-C(3)    | -177.1(3) |
| N(1)-C(2)-C(3)-C(9)    | 178.4(4)  |
| C(6)-C(2)-C(3)-C(9)    | 1.6(6)    |
| N(1)-C(2)-C(3)-N(2)    | -0.4(4)   |
| C(6)-C(2)-C(3)-N(2)    | -177.3(4) |
| N(1)-C(1)-N(2)-C(3)    | -0.9(4)   |
| Au(1)-C(1)-N(2)-C(3)   | 172.5(3)  |
| N(1)-C(1)-N(2)-C(10)   | -173.3(3) |
| Au(1)-C(1)-N(2)-C(10)  | 0.1(5)    |
| C(9)-C(3)-N(2)-C(1)    | -177.8(4) |
| C(2)-C(3)-N(2)-C(1)    | 0.9(4)    |
| C(9)-C(3)-N(2)-C(10)   | -6.0(7)   |
| C(2)-C(3)-N(2)-C(10)   | 172.7(3)  |
| C(1)-N(1)-C(4)-C(5)    | 110.7(4)  |
| C(2)-N(1)-C(4)-C(5)    | -72.8(4)  |
| N(1)-C(4)-C(5)-S(1)    | -74.9(4)  |
| Au(2)-S(1)-C(5)-C(4)   | 51.1(3)   |
| Au(1)#1-S(1)-C(5)-C(4) | -51.9(3)  |
| N(1)-C(2)-C(6)-C(7)    | -177.8(4) |
| C(3)-C(2)-C(6)-C(7)    | -1.8(6)   |
| C(2)-C(6)-C(7)-C(8)    | 0.8(6)    |
| C(6)-C(7)-C(8)-C(9)    | 0.4(7)    |
| C(7)-C(8)-C(9)-C(3)    | -0.7(7)   |
| N(2)-C(3)-C(9)-C(8)    | 178.3(4)  |
| C(2)-C(3)-C(9)-C(8)    | -0.3(6)   |
| C(1)-N(2)-C(10)-C(11)  | 91.5(4)   |
| C(3)-N(2)-C(10)-C(11)  | -79.5(5)  |
| C(1)-N(2)-C(10)-C(12)  | -142.7(4) |
| C(3)-N(2)-C(10)-C(12)  | 46.3(5)   |

---

Symmetry transformations used to generate equivalent atoms:

#1 -x+5/4,y,-z+1/4 #2 x,-y+1/4,-z+1/4 #3 -x+7/4,-y+3/4,z



**3.4.12 Table S12: Hydrogen bonds for 5a [ $\text{\AA}$  and  $^\circ$ ].**

| D-H...A              | d(D-H) | d(H...A) | d(D...A)  | $\angle$ (DHA) |
|----------------------|--------|----------|-----------|----------------|
| C(4)-H(2)...F(4)     | 0.99   | 2.45     | 3.114(4)  | 124.1          |
| C(4)-H(2)...F(5)     | 0.99   | 2.32     | 3.155(12) | 142.0          |
| C(4)-H(2)...F(7)#3   | 0.99   | 2.38     | 3.353(11) | 166.4          |
| C(5)-H(3)...F(3)     | 0.99   | 2.61     | 3.167(8)  | 115.6          |
| C(5)-H(3)...F(8)#3   | 0.99   | 2.61     | 3.353(11) | 132.1          |
| C(6)-H(5)...F(5)     | 0.95   | 2.58     | 3.424(9)  | 148.7          |
| C(9)-H(8)...F(2)#4   | 0.95   | 2.36     | 3.151(6)  | 140.9          |
| C(9)-H(8)...F(6)#5   | 0.95   | 2.43     | 3.147(11) | 132.2          |
| C(11)-H(11)...F(1)#6 | 0.98   | 2.59     | 3.568(6)  | 173.4          |
| C(12)-H(13)...F(6)#4 | 0.98   | 2.43     | 3.163(9)  | 131.0          |
| C(12)-H(15)...S(1)#2 | 0.98   | 2.87     | 3.603(5)  | 132.1          |

Symmetry transformations used to generate equivalent atoms:

#1  $-x+5/4, y, -z+1/4$  #2  $x, -y+1/4, -z+1/4$  #3  $-x+7/4, -y+3/4, z$   
#4  $-x+2, y-1/4, z-1/4$  #5  $x+1/4, -y+1/2, z-1/4$  #6  $-x+3/2, -y+1/2, -z$

### 3.5 Cyclic voltammetry

#### 3.5.1 Figure S23: Cyclic voltammogram of 5a.

Scan rate: 50 mV/s; Potential window: -2.5 V to 2.5 V; Electrolyte: 0.10 M  $[\text{NH}_4][\text{ClO}_4]$ ; Quiet time: 2s; Sample concentration: 0.010 M.

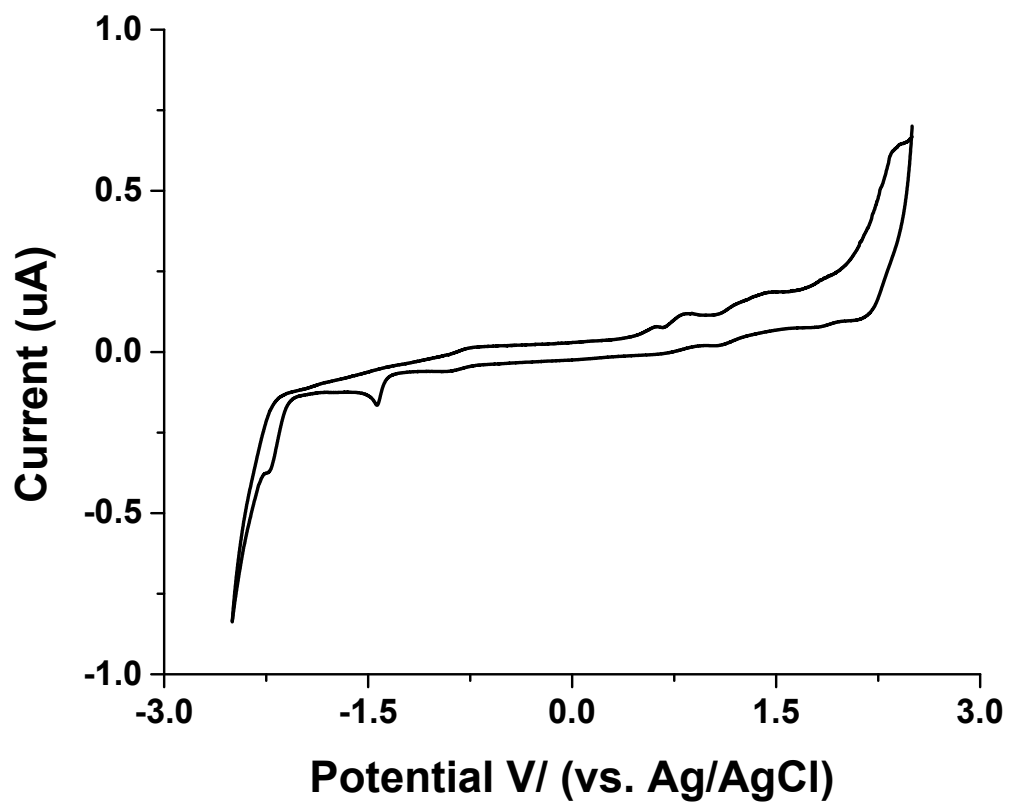

## 4. Computational data

### 4.1 Computational analysis of cluster 5a.

#### 4.1.1 Figure S24: Relaxed structure of 5a calculated using PBE functional.

Au atoms are labeled as 1-6 in reference to Table S13.

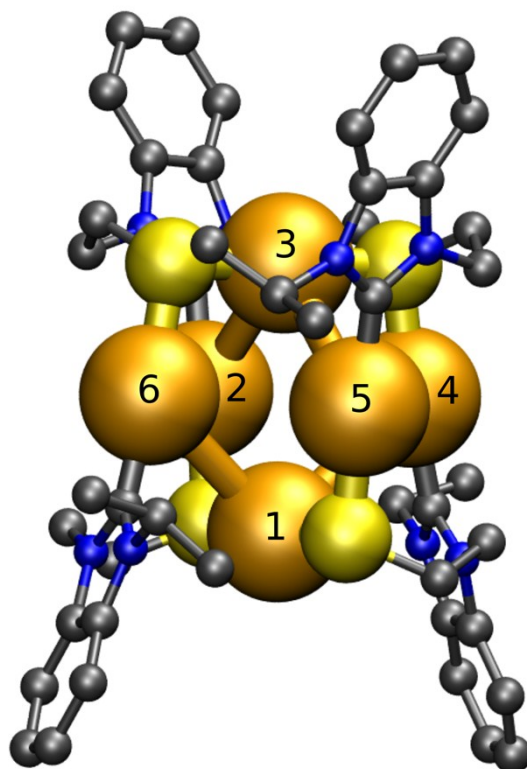

#### 4.1.2 Figure S25: Gold-projected density of states for 5a.

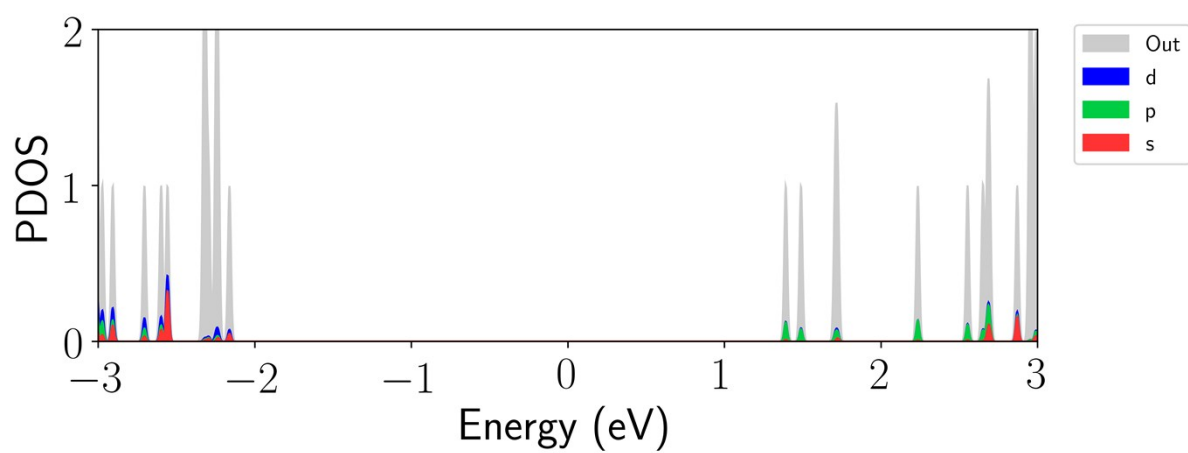

4.1.3 Figure S26: A few frontier orbitals for 5a.

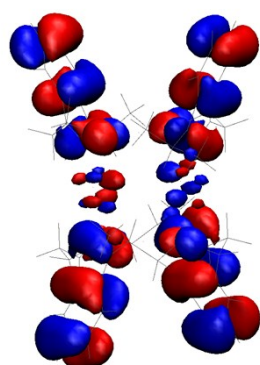

**HOMO-2**

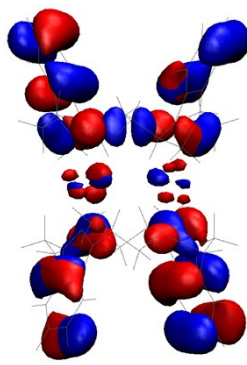

**HOMO-1**

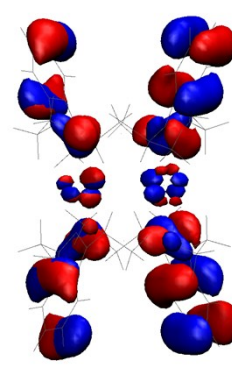

**HOMO**

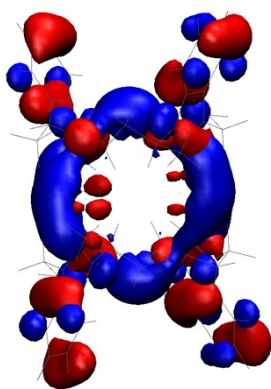

**LUMO**

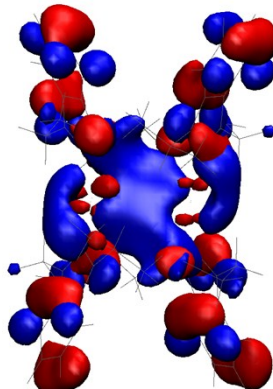

**LUMO+1**

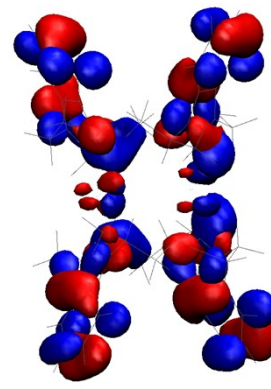

**LUMO+2**

#### 4.1.4 Table S13: Shortest Au-Au distances in 5a.

| Au-Au | Experimental geometry Distance [5a][PF <sub>6</sub> ] <sub>2</sub> (Å) | Optimized geometry distance (Å) |
|-------|------------------------------------------------------------------------|---------------------------------|
| 1-6   | 3.537                                                                  | 3.637                           |
| 1-5   | 3.426                                                                  | 3.582                           |
| 1-3   | 4.633                                                                  | 4.753                           |
| 1-4   | 3.537                                                                  | 3.600                           |
| 2-3   | 3.537                                                                  | 3.597                           |
| 3-4   | 3.426                                                                  | 3.592                           |
| 3-5   | 3.537                                                                  | 3.626                           |

#### 4.1.5 Figure S27: Dipole transition contribution maps (DTCM) analysis for 5a – Principal axes of moments of inertia.

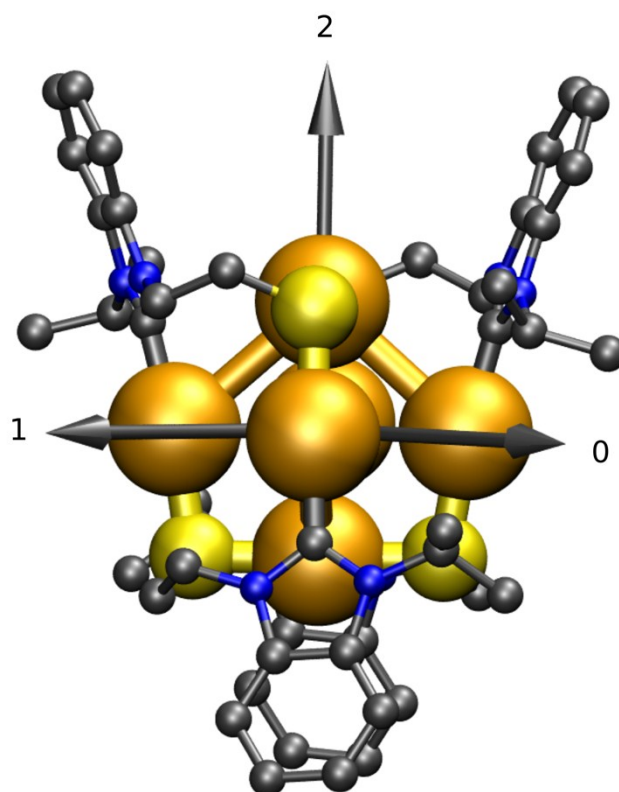

#### 4.1.6 Figure S28: DTCM for peak at E = 3.779 eV.

Red / blue areas indicate constructive / destructive contributions of individual transitions to the total dipole moment. PDOS is analysed as projected to atomic Au s, p, d components. The grey area denotes orbital weights in ligands.

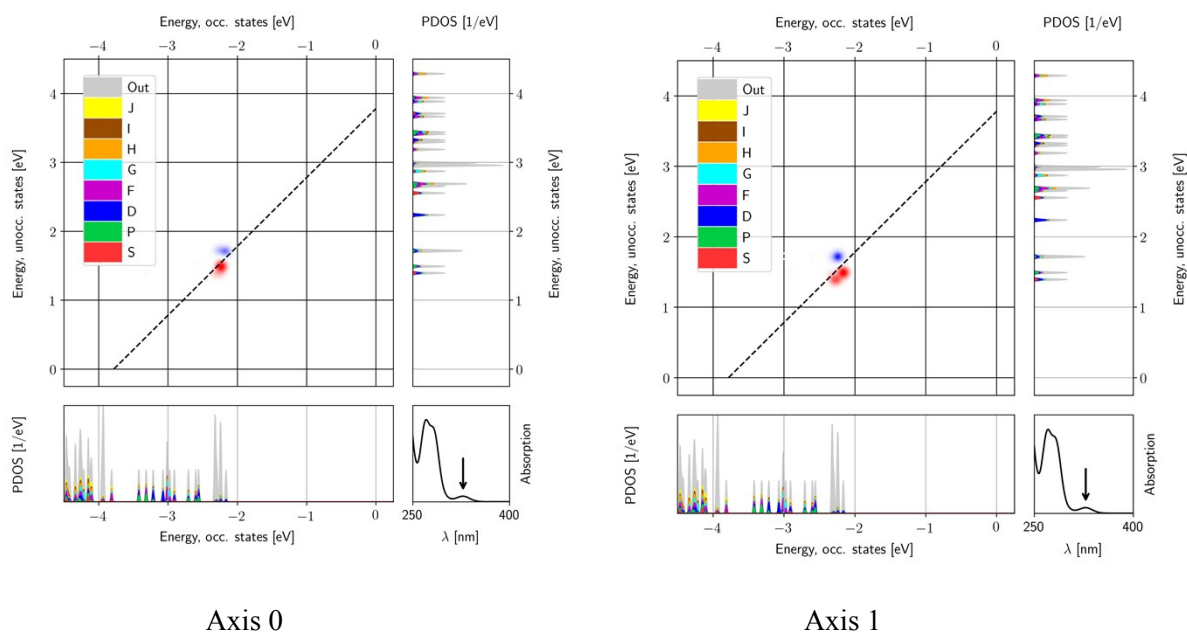

#### 4.1.7 Figure S29: DTCM for peak at E = 4.413 eV.

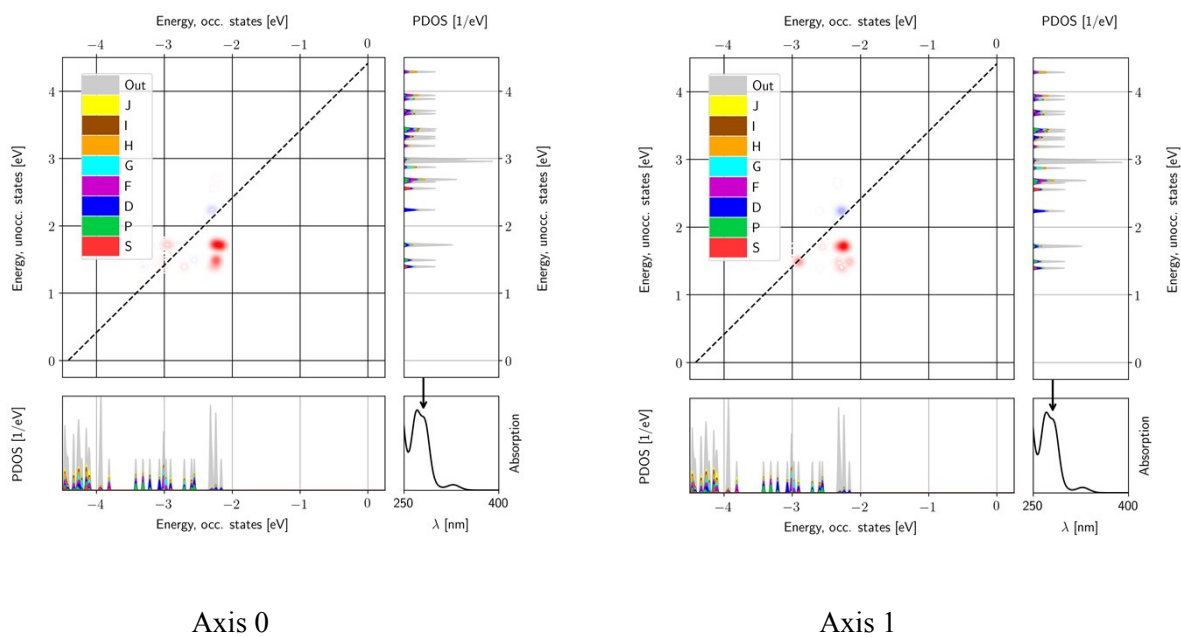

#### 4.1.8 Figure S30: DTCM for peak at E = 4.570 eV.

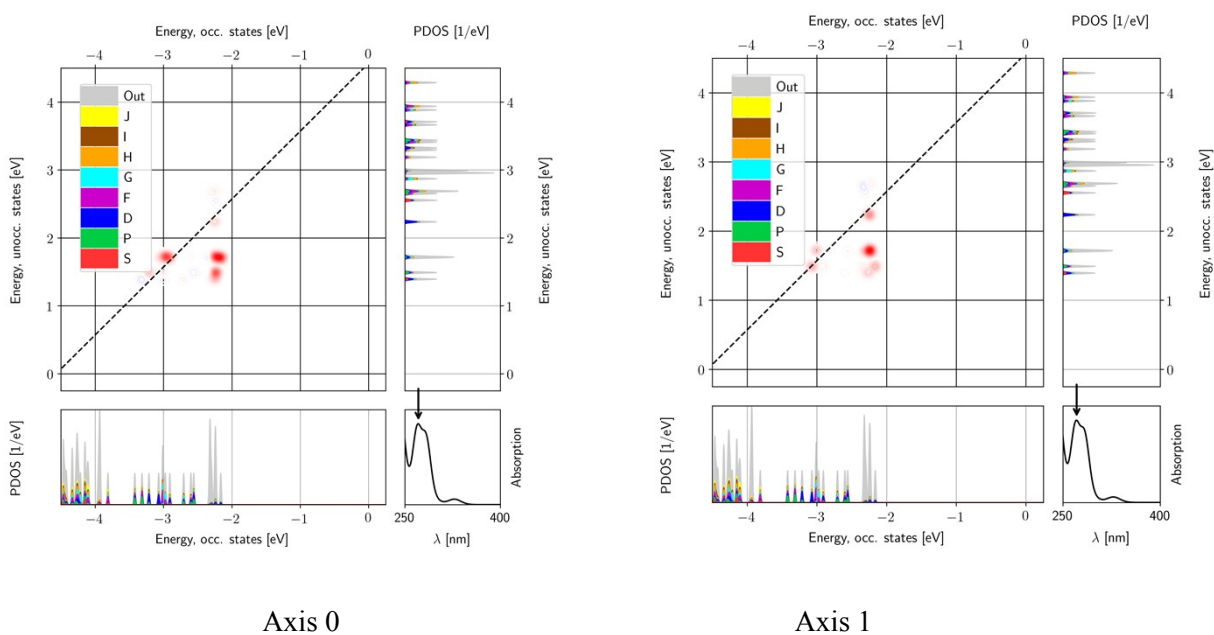

## 5. References

1. a) Y. Zhu, C. Cai and G. Lu, *Helv. Chim. Acta*, 2014, **97**, 1666. b) M. -C. Brandy, M. C. Jennings and R. J. Puddephatt, *J. Chem. Soc., Dalton Trans.*, 2000, 4601.
2. H. Hope, *Prog. Inorg. Chem.*, 1993, **41**, 1.
3. G. M. Sheldrick, *Acta. Cryst.*, 2015, **A71**, 3.
4. G. M. Sheldrick, *Acta. Cryst.*, 2015, **C71**, 3.
5. J. Enkovaara, et. al. *J. Phys. Condens. Matter*, 2010, **22**, 253202.
6. J. P. Perdew, K. Burke, and M. Ernzerhof, *Phys. Rev. Lett.*, 1996, **78**, 3856.
7. M. Kuisma, J. Ojanen, J. Enkovaara, and T. T. Rantala, *Phys. Rev. B*, **82**, 115106
8. M. Walter, H. Häkkinen, L. Lehtovaara, J. Enkovaara, C. Rostgaard and J. J. Mortensen, *J. Phys. Chem.*, 2008, **128**, 244101.
9. S. Malola, L. Lehtovaara, J. Enkovaara, and H. Häkkinen, *ACS Nano*, 2013, **7**, 10263
